# Supplementary material for: A diverse portfolio of marine protected areas can better advance global conservation and equity
Source: PubMed Central journal article supplement — Proc Natl Acad Sci U S A. 2024 Feb 26;121(10):e2313205121. doi: 10.1073/pnas.2313205121 (PMC10927568; doi:10.1073/pnas.2313205121), 2024-02-26
Supplement: pnas.2313205121.sapp.pdf [file pnas.2313205121.sapp.pdf]

## Supporting Information Appendix for

### **A diverse portfolio of marine protected areas can better advance global conservation and equity**

David A. Gill, Sarah E. Lester, Christopher M. Free, Alexander Pfaff, Edwin Iversen, Brian J Reich, Shu Yang, Gabby Ahmadi, Dominic A. Andradi-Brown, Emily Darling, Graham J. Edgar, Helen E. Fox, Jonas Geldmann, Duong Trung Le, Roosevelt Mesa-Gutiérrez, Michael B. Mascia, Peter J. Mumby, Laura Veverka, Laura M. Warmuth

Corresponding author: [david.gill@duke.edu](mailto:david.gill@duke.edu)

#### **The PDF file includes:**

Materials and Methods  
References  
Figs. S1 to S12  
Tables S1 to S13

## 23 **1 Study design**

### 24 1.1 MPA impacts on fish populations (mechanisms)

25 The IUCN defines protected areas (PAs) as “a clearly defined geographical space, recognized, dedicated  
26 and managed, through legal or other effective means, to achieve the long-term conservation of nature  
27 with associated ecosystem services and cultural values” (1). Marine protected areas (MPAs) refer to “any  
28 area of intertidal or subtidal terrain, together with its overlying water and associated flora, fauna,  
29 historical and cultural features, which has been reserved by law or other effective means to protect part  
30 or all of the enclosed environment (2).” MPAs can lead to increased fish biomass by imposing restrictions  
31 that reduce extractive and destructive activities (primarily fishing) within the MPA boundaries, thus the  
32 magnitude and rate of fish population recovery (i.e., MPA impact) is highly dependent on the level of  
33 restrictions, the adequacy and appropriateness of management to facilitate sustainable use, and the pre-  
34 existing context (e.g., historic exploitation rates, species life history, habitat quality) (3–8).

### 35 1.2 Factors affecting MPA placement (selection criteria)

36 MPAs are not randomly placed in the ocean; many MPAs are situated in areas with low benefits from  
37 exploitation (9) or to protect areas with high biodiversity or tourism value (10, 11). In these cases, MPA  
38 fish populations would be expectedly higher than those in non-MPA locations regardless of protection, as  
39 non-MPA locations might have higher historical exploitation rates or lower habitat quality (e.g., lower fish  
40 abundance from low reef complexity (12)) than MPA locations. This may also be the case for MPA types,  
41 where protected areas that prohibit all extraction (no-take) are systematically placed in different locations  
42 than other protected area types (e.g., multiple-use MPAs) (13). Such differences were observed in  
43 terrestrial PAs, with more strict PAs located in areas where land conversion was less likely (14). Given that  
44 MPAs that prohibit all fishing (i.e., no-take MPAs) and MPAs that allow some fishing (multiple-use MPAs)  
45 incur different opportunity and social costs for extractive uses, we hypothesize that choice of MPA type  
46 can also be influenced by these opportunity costs and the associated fishing history. For example, no-take  
47 MPAs may be established (intentionally or unintentionally) in areas in better ecological condition (15)  
48 (e.g., higher coral cover in Florida Keys no-take zones (11)) or areas with fewer human stressors (e.g.,  
49 areas less accessible or desirable for fishing). If so, no-take MPAs that are placed in relatively undisturbed  
50 areas where fish stocks are less threatened and in better condition may have greater standing biomass  
51 but a smaller impact compared to multiple-use MPAs placed in more heavily used areas (13).

### 52 1.3 Factors affecting outcomes

53 In addition to biases in no-take and multiple-use MPA/zone placement, any spatial comparison is likely  
54 affected by time-invariant and time-varying socio-environmental factors that differ between the treated  
55 and control locations. Social (e.g., traditional/cultural uses) (16), political (e.g., regulatory framework),  
56 economic (e.g., capital invested in marine resource activities) (17), and environmental (e.g., habitat types,  
57 ocean conditions, pollution levels) (18–20) conditions and trends can differ between sites, and account  
58 for much of the differences in fish populations between protected and unprotected sites (21, 22).

59 An ideal study design for evaluating MPA impacts uses comparable no-take, multiple-use, and non-MPA  
60 sites where long-term monitoring data on fish populations and socio-environmental conditions are  
61 collected for a significant duration before and after establishment (10, 22). However, such datasets are  
62 scarce or potentially non-existent, given the paucity of baseline and long-term MPA monitoring data for  
63 specific sites much less across regional or global scales (23, 24). It also requires considerable foresight and

64 resources to collect data at control sites which account for biases in MPA placement (10, 21). In the  
65 absence of such data and recognizing its limitations (Section 6), we used our previously assembled global  
66 dataset of over 15,000 no-take, multiple-use, and non-MPA sites within and around over 287 MPAs in 43  
67 countries and territories to estimate the relative impacts of MPAs that prohibit (no-take) and restrict  
68 (multiple-use) fishing. We also compiled detailed data on the social, environmental, management, and  
69 regulatory conditions at each study site, using matching and regression analyses to account for  
70 confounding factors that affect MPA placement and fish biomass outcomes (21, 25). We use MPAs as our  
71 unit of analysis or, in the case of MPAs with multiple-use and no-take zones, the zone type within the  
72 MPA.

73 A detailed methods plan for the initial iteration of this study was posted and publicly shared on the Open  
74 Science Framework platform in 2019 (26).

## 75 **2 Step 1: Data compilation**

76 Fig. S1 describes the analysis steps 1-3, and the corresponding sensitivity and diagnostic tests.

### 77 **2.1 Fish biomass outcomes**

78 We built on a global synthesized dataset of fish populations from Gill et al (6), with the full dataset  
79 comprising species or family level observations from 15,978 underwater visual census surveys conducted  
80 in and around 287 MPAs in 58 countries (see Gill et al (6) for data sources and description). Each survey  
81 site represents a single survey from a specific location at a particular period in time. We averaged transect  
82 level observations to get total biomass (grams) to units per 100m<sup>2</sup> for each site, based on the survey area  
83 and methodology, as the number of transects at each site varied by survey methodology. If no fish biomass  
84 data were provided by the data providers, we calculated fish biomass using the individual body lengths  
85 and allometric length-weight data obtained either from the data provider or from FishBase (27).

86 We used total biomass of all fish >10cm at each survey site (g/100m<sup>2</sup>) as an indicator of conservation  
87 outcomes given its sensitivity to recovery from fishing, and its strong relationship to other conservation  
88 objectives such as species diversity (23, 28, 29). We only considered fish >10 cm to avoid recruitment  
89 effects, high variability associated with observing small cryptic species, and to focus the analysis on  
90 fishable species (30, 31). To reduce the effect of outliers, we use the natural log of the ratio of fish biomass  
91 of matched treatment and control sites as an indicator of MPA performance (i.e., treatment effects).

92 Given that not every site had fish >10cm (resulting in total biomass of 0 for that site; 997 survey sites), we  
93 followed Thiault et al (32) and Cresswell et al (24) by adding a small constant to biomass for all sites to  
94 avoid calculating log ratios with zero values (10). This constant represents the smallest total biomass value  
95 observed in the dataset (1.09 g/100m<sup>2</sup>). To ensure that the choice of constant did not affect the results,  
96 we ran sensitivity tests with constants of different magnitudes (0.1 -10x constant). Such substantial  
97 changes in magnitude of the constant only marginally changed the estimated site-level average treatment  
98 effect (Fig. S6).

#### 99 **2.1.1 Unclear or ambiguous observations and sites**

100 We removed species-level records with biomass values >200,000 g/100m<sup>2</sup>. These were predominantly  
101 observations of large schools of mobile pelagic fish (e.g., *Scombrids*, *Sphyraenids*) or large transient  
102 species (e.g., *Manta birostris*) as it would be difficult to attribute these observations to protection at that

103 site, particularly for small MPAs. We tested for the effect of schooling species by re-estimating the  
104 treatment effects after removing observations of fish with > 250 individuals. Removing these observations  
105 did not result in a significant change in the average estimated site-level treatment effects (Fig. S6). While  
106 our approach seeks to incorporate as much available data as possible, future studies could explore the  
107 sensitivity of results to wholly excluding species known to school.

108 Of the 15,978 survey sites in the dataset, we removed surveys where we were unable to calculate biomass  
109 due to missing data (n=65 sites). Habitat is an important confounder when assessing protection effects  
110 (19, 32–34), therefore, we removed survey sites without habitat data (n= 36 survey sites) and those  
111 conducted in rare habitats (e.g., pinnacles, ridges, back reefs; n=13 survey sites) given that these sites  
112 were unlikely to have an appropriate match. We also excluded sites where protection-level was unclear  
113 (n=158) or unclear how MPA protection might affect fin-fish (e.g., most whale sanctuaries). To reduce the  
114 likelihood of spillover affecting the results, we removed all survey sites within 1 km of the MPA boundary  
115 (n = 1,116 sites). Finally, to allow a lag time for fish response to protection, we removed sites in MPAs less  
116 than 3 years old (n = 850 sites). The final dataset used in the analysis included 14,044 sites (89.9% of  
117 original dataset) from within 335 zones in 216 MPAs (Fig. 1a)<sup>1</sup>.

## 118 2.2 MPA regulations

119 In this study, we defined no-take as areas that do not allow any forms of fishing (subsistence, commercial,  
120 recreational) at any period of time. To identify the fishing regulations at each survey site, we compiled  
121 spatial and regulatory information on MPA and MPA zone boundaries. We extracted spatial and attribute  
122 data for these MPAs from the spatial datasets described in the “MPA spatial data” section. To identify  
123 fishing regulations, we compiled over one thousand documents and maps that described the activities  
124 permitted or prohibited in each zone of each MPA. Here we extracted information on zone names, area,  
125 and regulations, with a focus on fishing regulations to determine whether sites were located within a no-  
126 take or a multiple-use zone. We ranked each document or map based on 1) credibility of the source and  
127 2) publication date. Here we prioritized resources from state or other management agencies (e.g., MPA  
128 gazette document, local or national fishing regulations) or scientific publications and documents  
129 created within three years from the time when the fish surveys were conducted given the dynamic nature  
130 of MPA regulations. To further ensure reliability, we attempted to source at least two highly credible and  
131 relevant sources for each MPA, cross-validating information with other independent sources (e.g., World  
132 Database of Protected Areas (WDPA)), and reached out to local or regional experts for MPAs where we  
133 did not have high confidence in the provided information. While low confidence data does not mean that  
134 the information is incorrect (e.g., only one non-government source found, regulations not within three  
135 years of fish survey), as a sensitivity test, we re-estimated treatment effects after removing sites where  
136 we had low confidence in the fishing regulations (n=2,318 or 15.8% of final dataset) and this did not result  
137 in a significant change the average site-level treatment effects (Fig. S6).

138 **MPA spatial data:** We compiled spatial and regulatory information on MPA and MPA zone boundaries to  
139 identify the fishing regulations at each survey site, using MPA and regulatory data close in time to when  
140 surveys were conducted (see section above). We extracted spatial and attribute data for these MPAs from  
141 a larger spatial dataset of over 17,000 MPA and zone boundary shapefiles compiled by the authors and

---

<sup>1</sup> The sum of number of disqualified sites is larger than total number of sites removed as some sites were excluded for multiple reasons.

142 other research partners (see Acknowledgements). For this larger dataset, we first used the boundary files  
143 for MPAs from the November 2017 version of the World Database of Protected Areas (35), and validated  
144 or filled missing data using other national, regional, and global datasets. These datasets provided polygon  
145 information for MPAs in the Caribbean ((36), (37), (38)), Australia (39), United States mainland and  
146 overseas territories (37), and other locations around the world (e.g., MPA Atlas (40)). We focused on  
147 nationally designated marine and coastal MPAs and excluded large sanctuaries that spanned national  
148 waters or seas (e.g., Southern Ocean Whale Sanctuary), as: 1) most were established after the fish surveys  
149 were conducted; 2) given that regulations usually focused on non-fish species, their effect on fish  
150 populations were likely to be minimal or uniform across MPA and non-MPA survey sites. The final dataset  
151 comprised 17,122 MPA and zone boundary polygons.

152 We also used our compiled documents (see MPA regulations section) and other online sources to acquire  
153 spatial information on zone boundaries for our study MPAs (n=287 MPAs) that were not available in the  
154 above datasets. We used Google Earth and ESRI ArcGIS to georeference MPA zoning maps from the most  
155 credible and relevant sources available and create polygons for each MPA zone. We then imported the  
156 resulting 809 polygons into R and added the relevant regulation data for each zone. We plotted and  
157 compared each digitized zone polygon to sourced maps to ensure that they retained the correct spatial  
158 information after processing. This resulted in an additional 1,031 polygons containing zone and (outer)  
159 MPA boundaries for our study MPAs.

160

### 161 2.3 MPA management and governance

162 We used a dataset compiled by Gill et al (6) that describes the adequacy and appropriateness of  
163 management within 433 MPAs in 70 countries. These indicators, drawn from surveys completed by MPA  
164 management staff and/or other stakeholders, provide insight on the effectiveness (i.e., adequacy of  
165 management activities and capacities) and equity (i.e., fairness or justness of management) of  
166 management processes. Although these types of assessments are vulnerable to strategic biases (e.g.,  
167 when conducted by a single MPA manager who may want to demonstrate high or low performance), other  
168 studies have shown that these data are effective at representing realities on the ground (41).

169

170 Assessment data took the form of ordinal responses to each question along with descriptive text  
171 responses. Gill et al (6) sourced and compiled these data from three management assessment tools: the  
172 Management Effectiveness Tracking Tool (METT) (42), the World Bank MPA Score Card (43), and the NOAA  
173 Coral Reef Conservation Program's (CRCP) MPA Management Assessment Checklist (44, 45), rescaling the  
174 ordinal response data to ensure construct validity across assessments (Table S4). In addition to the  
175 rescaled scores, following Gill et al (6), we developed binary thresholds for effective management for each  
176 indicator based on the scoring criteria and alignment with social theory (46–48). See Gill et al (6) for more  
177 information on data sourcing and processing and Table S4 for descriptions of response categories and  
178 thresholds.

## 179 **3 Step 2: Site-level bias-adjusted treatment effects**

### 180 3.1 Estimating fish biomass impacts

181 Estimating the relative effectiveness of these two policies requires considering several policy (treatment)  
182 scenarios. For example, to assess no-take MPA impacts, we will need to compare no-take fish biomass  
183 outcomes with outcomes if instead they were unprotected (here denoted by NT:0), as well as with  
184 outcomes if these same sites were inside a MU MPA instead (NT:MU|NT). Similar to Ferraro et al (13) and

185 Rasolofoson et al (49), we estimate relative impacts between no-take and multiple-use MPAs by  
186 comparing each MPA type to two counterfactual outcomes: no MPA and the alternative MPA type,  
187 resulting in four treatment effects (Table S6).

188 Here we define treatment as no-take or multiple-use MPA establishment. We also define MPA impacts as  
189 the expected difference in total fish biomass (Y) observed in treated ( $Y_1 | T_i = 1$ ) and counterfactual units  
190 ( $Y_0 | T_i = 0$ ) in treated locations (i.e. average treatment effect on the treated (ATT)), conditional on  
191 observed conditions X (Equation (1)) (50). See Table S6 for the treatment and counterfactual group for  
192 each comparison. The ATT for survey site  $i$  is:

$$193 \quad \text{ATT}_i = E(Y_{i1} - Y_{i0} | T_i = 1, X_i) \quad (1)$$

194 where  $Y_i$  is total fish biomass at site  $i$ ,  $T_i$  is treatment (0-control; 1- treated) and  $X_i$  are covariates.

### 195 3.2 Matching

196 We estimated the average treatment effect on the treated (ATT) for each comparison (Table S6) using  
197 statistical matching and regression adjustments. Here we identify comparable untreated sites to pair with  
198 treated sites based on the covariates (confounding factors: X) that affect both treatment and outcomes  
199 (25, 50) (Table S7). The assumption is, conditional on these observed factors, that treated and matched  
200 control units are interchangeable, and will on average have the same outcomes in the absence of  
201 treatment, making them an appropriate counterfactual (51, 52).

#### 202 3.2.1 Matching covariates

203 Table S7 describes the covariates we used to match treated and control sites. We used exact matching for  
204 habitat type, country, ecoregion, and data source, ensuring that no treated site is paired with a control  
205 site from a different ecosystem, political or regulatory system, or sampled using a different methodology.  
206 This controlled for unobserved factors associated with these covariates (e.g., national fisheries policies,  
207 oceanographic conditions unique to particular ecoregions, etc.). For the remaining (continuous)  
208 covariates, we used nearest-neighbor matching based on Mahalanobis distances to identify control units  
209 for each treatment group, as this matching approach provided greater covariate balance with fewer  
210 dropped observations than other attempted approaches (see Section 5.1 for more details).

211 We used the Matching package v4.10-2 (53) in the R statistical software v4.2.0 (R Core Team, 2019) to  
212 match two control sites to each treated site (2:1 matching), reducing potential biases introduced from  
213 extreme observations when matching to a single control site (i.e., 1:1 matching). To improve match quality  
214 with the limited number of control sites, we matched with replacement, and permitted ties between  
215 matches (i.e., >1 control site with the same multivariate distance from a treatment site) where the weights  
216 of tied matches summed to one (53, 54). Given that human population density, distance to population  
217 center, and shore distance have been shown to strongly affect fish biomass outcomes and likely to affect  
218 MPA placement (due to their association with extractive uses such as fishing; (55, 56)), we applied calipers  
219 during the matching process to ensure that matched treatment and control sites did not differ in these  
220 covariates beyond one standard deviation. See Table S7 for more details on covariates and calipers.

### 221 3.3 Post-matching bias adjustment

222 Post-matching balance statistics suggest that matching significantly reduced the differences between  
223 treatment and control sites (Fig. S7 and Table S8), with the standardized mean differences of each  
224 covariate well below the recommended level of 0.25 or 25% (57). Nonetheless, some bias in treatment

225 effects can remain due to residual differences in covariates between treated and control sites (58). We  
 226 therefore used random forest models to identify and remove the post-matching differences in outcomes  
 227 that can be explained by differences in the social and environmental conditions (i.e., covariates) between  
 228 treated and control sites (59). Random forest models estimate the predicted values based on higher order  
 229 interactions and non-parametric recursive partitioning over the n-dimensional covariate space (60). We  
 230 chose random forests over linear approaches given their ability to predict in cases where there are  
 231 heterogeneous, unscaled predictors with various non-linear functional forms and potential higher order  
 232 interactions (61–64) making them better suited to model relationships within complex social-ecological  
 233 systems.

234 We carried out three major steps in this approach. First, we used the *regression\_forest* function in the *grf*  
 235 package v2.1.0 (65) to model the relationships between the covariates and biomass outcomes in  
 236 untreated (non-MPA) locations (to avoid influence of treatment effect), and used this model to predict  
 237 fish biomass outcomes for all (treated and control) sites. Second, for each match set (i.e., comparisons in  
 238 Table S6), we then calculated the difference between predicted biomass between treated and matched  
 239 control units ( $\hat{\mu}_1(X_i) - \hat{\mu}_0(X_i)$ ). This estimates the difference in outcomes that can be explained by the  
 240 observed covariates. Lastly, we removed this predicted difference from our treatment effects to get the  
 241 bias-adjusted values (Equation (2)). For the random forest models, we included a cluster level factor to  
 242 account for similarity between sites of the same MPA or zone, and generated 10,000 trees in each forest  
 243 to ensure stability. Given the sensitivity of random forest models to the choice of tuning parameters, we  
 244 used the “*tune.parameters*” argument which uses cross-validation to identify the most appropriate  
 245 parameters based on the data (100 tuning trees) (65). We also used “out of bag” prediction to improve  
 246 accuracy (66).

$$247 \quad ATT_{bias-adjusted, i} = E(Y_{i1} - Y_{i0} | T_i = 1, X_i) - (\hat{\mu}_1(X_i) - \hat{\mu}_0(X_i)) \quad (2)$$

#### 248 **4 Step 3: MPA-level treatment effects**

249 We used Bayesian linear hierarchical models to estimate the MPA-level average treatment effects for each  
 250 estimand (Table S6). In each model, we used the site-level bias-adjusted treatment effects  
 251 ( $ATT_{bias-adjusted, i}$ ; Equation (2)) as the response variable. We used hierarchical models as they give  
 252 inference on the mean treatment effect based on population of MPAs and not just on our sample (67)  
 253 while allowing us to account for correlations induced by sampling multiple sites per MPA and re-use of  
 254 control sites in the matching process. This also helped to account for the uneven distribution of sites per  
 255 MPA which varied greatly (n=1 to 1,619 sites per MPA). For all models (Equations (5)-(8)), we report the  
 256 model intercept  $\alpha$  which represents the MPA-average treatment effect, and the probabilities of a positive  
 257 absolute (NT:0, MU:0) or relative (NT:MU|NT, NT:MU|MU) impacts (Table S9). We also report percent  
 258 biomass differences using the exponent of the model intercept  $\alpha$  (Equation (3)).

$$259 \quad \text{percent biomass difference} = (\exp(\alpha) \times 100) - 100 \quad (3)$$

260 We fitted the Bayesian models using JAGS software v4.3.0 (68) and R package Rjags v4-13 (69). To ensure  
 261 model stability, we ran 50,000 iterations for two chains, with sufficient burn in (10,000 iterations) and  
 262 then thinned (every 10<sup>th</sup> iteration) to reduce auto-correlation.

263 Our model evaluation efforts identified features in the data that required extensions of the standard linear  
 264 mixed model formulation. First, both the random effects estimates and models' residuals had more  
 265 extreme upper and lower quantiles than allowed for by normal distributions. We found that t-distributions  
 266 provided a better fit and therefore adjusted the model to include t-distributed random effects and error  
 267 terms to make the model more robust against outliers. In our most general model, we assumed response  
 268  $Y_i$  followed a Student t-distribution with location  $m_i$ , scale  $\sigma_i$  and  $d_1$  degrees of freedom:

$$269 \quad Y_i \sim t(m_i, \sigma_i, d_1) \quad (4)$$

270 We considered four different models for the location that include different types of random effects:

$$271 \quad m_i = \alpha + \gamma_{MPA_i,i} + (\delta_{CON_{i1},i} + \delta_{CON_{i2},i})/2 \quad (5)$$

272 or

$$273 \quad m_i = \alpha + \gamma_{MPA_i,i} + (\delta_{CON_{i1},i} + \delta_{CON_{i2},i})/2 + (\theta_{CON\_MPA_{i1},i} + \theta_{CON\_MPA_{i2},i})/2 \quad (6)$$

274 or

$$275 \quad m_i = \alpha + \beta_i + \gamma_{MPA_i,i} + (\delta_{CON_{i1},i} + \delta_{CON_{i2},i})/2 \quad (7)$$

276 or

$$277 \quad m_i = \alpha + \beta_i + \gamma_{MPA_i,i} + (\delta_{CON_{i1},i} + \delta_{CON_{i2},i})/2 + (\theta_{CON\_MPA_{i1},i} + \theta_{CON\_MPA_{i2},i})/2 \quad (8)$$

278 The scale was modeled as

$$279 \quad \log(\sigma_i) = a_1 + a_2 \log(N_i). \quad (9)$$

280  $\alpha$  represents the MPA treatment effect of interest.  $\beta$  is the binary fixed effect term for the population  
 281 center distance, capacity, and regulations models (Equations (7) and (8); see Table S3 and Table S4 for  
 282 distance, capacity, and regulations definitions and other details),  $MPA_i$  is the index of the MPA for  
 283 observation  $i$ ,  $CON_{i1}$  and  $CON_{i2}$  are the indices of the two controls matched to treated observation  $i$  and  
 284  $N_i$  is the number of samples drawn from observation  $i$ 's MPA (Equation (9)). The random effects  $\gamma_j$  and  
 285  $\delta_k$  were included to account for dependence between observations that share an MPA and control  
 286 respectively, and are modeled as  $\gamma_j \sim t(0, \tau_1, d_2)$  and  $\delta_k \sim t(0, \tau_2, d_2)$ . For the direct no-take to  
 287 multiple-use NT:MU comparisons, we also included a random intercept  $\theta_m$  for control sites from the same  
 288 MPA (Equations (6) and (8)). While other random effects structures were possible (e.g., random intercepts  
 289 for each MPA zone, country, or ecoregion, nested random effects, etc.), after running various iterations  
 290 of these models, Equations (5)-(8) represented the most parsimonious structure that best represented  
 291 the data.

292 We used uninformative prior distributions for the remaining parameters,  $d_1, d_2 \sim \text{Uniform}(1,30)$ ,  $\alpha \sim$   
 293  $\text{Normal}(0,100000)$ ,  $a_1, a_2 \sim \text{Normal}(0,1)$ , and  $\tau_1, \tau_2 \sim \text{Half-Cauchy}(0,1.8)$ . The Student t distributions are  
 294 used to allow for extremely large and small observations, and the log scale modeled in terms of MPA  
 295 sample size (Equation (9)) explains observed heteroskedasticity given that the error variance increased  
 296 with the number of sites per MPA.



## 297 5 Sensitivity tests

### 298 5.1 Matching sensitivity tests

299 Match quality can vary greatly depending on multiple factors: covariate specification, number of matched  
300 controls per treated unit, choice of calipers, and more (53, 54). To identify the best approach for our data,  
301 we assessed the match quality of multiple specifications using post-matching balance statistics to identify  
302 the specification that had better covariate balance (e.g., lower standardized mean difference and quantile-  
303 quantile differences, etc.; Table S8) and fewer dropped “unmatched” treated observations. Tested  
304 specifications included nearest-neighbor matching on 1) all covariates, 2) propensity scores, 3) propensity  
305 scores and covariates strongly correlated with treatment and outcomes (i.e., human population density,  
306 shore distance, market distance), and 4) propensity scores and all covariates. We also assessed the post-  
307 matching statistics with two and three controls matched to each treated site, more and less strict caliper  
308 widths on influential covariates (e.g., maximum shore distance difference of 0.5 or 1 SD), and  
309 transformations on covariates with skewed distributions. Of the specifications attempted, nearest-  
310 neighbor matching on all untransformed covariates with two control sites per treated unit achieved the  
311 best covariate balance and fewest dropped observations. To account for potential interactions between  
312 covariates, we also added a quadratic term for some covariates and estimated counterfactual conditions  
313 using random forest models (which account for higher order interactions (61)) instead of matching. These  
314 approaches did not improve match quality.

315

### 316 5.2 Unobserved bias

317 While matching reduces the biases between treated and control units based on observed covariates, MPA  
318 placement could be determined by other unaccounted or unobserved factors. For example, if  
319 implementors systematically place no-take or multiple-use MPAs in specific locations for reasons other  
320 than those included in the list of covariates (Table S7), social-ecological conditions and thus fish biomass  
321 outcomes may differ greatly between no-take, multiple-use, and unprotected sites even without  
322 protection. However, given that these factors are mostly unknown, they are impossible to identify or  
323 directly measure (25). Here we employed a confounding sensitivity test, adapted from Blackwell (70), to  
324 ascertain the sensitivity of our results to unknown and unaccounted confounding factors that might  
325 explain differences in MPA placement. This test has advantages over other sensitivity tests given that: 1)  
326 it provides information on the magnitude and direction of the confounding needed to overturn inference  
327 (e.g., assuming positive impacts when they are actually negative); and 2) it is independent of the number  
328 and types of unknown confounders or estimation strategy (70). In this test, we examined the sensitivity  
329 of our results to unknown confounding by examining how the magnitude and direction of each treatment  
330 effect varies when exposed to varying amounts of hypothetical confounding. Here we created scenarios  
331 where unknown factors (U) that affect MPA placement have half up to two ( $U = \alpha = 0.5 - 2$ ) times the  
332 effect on fish biomass than all the observed covariates (e.g., shore distance, depth, etc.). We did this in  
333 four steps. First, we calculated the bias in treatment effects explained by the observed covariates. We did  
334 this by using regression forest models to predict fish biomass outcomes based on observed covariates for  
335 treated ( $\hat{\mu}_1(X_i)$ ) and control ( $\hat{\mu}_0(X_i)$ ) units separately. We used regression forests to account for non-  
336 linear functional forms and potential higher order interactions between variables. Here  $obs. effect_i$   
337 (Equation (10)) represents the difference in fish biomass outcomes between control and treatment sites  
338 that can be explained by the remaining post-matching differences in covariates.

339

$$340 \quad obs. effect_i = \hat{\mu}_1(X_i) - \hat{\mu}_0(X_i).$$

341 (10)

341

342 Second, we computed a range of hypothetical confounding estimates based on the *obs.effect<sub>i</sub>*  
343 ( $\alpha \times obs.effect_i$ ; where  $0.5 < \alpha < 2$ ) and added these values to control outcomes (Equation (11)).  
344 This simulated a potential confounding that increases or decreases counterfactual outcomes where  
345 negative  $\alpha$  values (i.e., biasing control outcomes downward) suggest that treated sites are placed in  
346 locations that inherently have greater fish biomass than control locations.

$$347 \quad Y_i^q = Y_i + (1 - T_i)\alpha \times obs.effect_i P[T_i = 1 | X_i] \quad (11)$$

349 where  $T_i = 1$  in treated and 0 in control sites. See Figure S8 for sensitivity test results.

351  
352 Third, we re-estimated the bias-adjusted ATT treatment effects using the confounded control outcomes  
353  $Y_i^q$ . As expected, our hypothetical results suggested that if such confounding factors exist, our estimates  
354 of MPA impacts would decrease with increasing amounts of (positive) confounding, especially the  
355 estimates of the absolute impacts of no-take MPAs (NT:0; Fig. S8). In other words, of all the estimands,  
356 the estimate of no-take MPA impacts were most sensitive to selection bias (e.g., positive impacts  
357 disappear if the effect of unknown factors on biomass outcomes are ~75% of the effect from observed  
358 covariates). As mentioned before, whether such biases exist, or would have such a strong effect on  
359 outcomes that were close to or beyond those of the observed covariates is unknown and unmeasurable.  
360 This is unlikely, as such unknown placement biases would have to be systemic, with a consistently strong  
361 effect on numerous MPAs globally. Furthermore, by using exact matching, we account for unobserved  
362 biases introduced by social, political, and ecological factors (e.g., selecting control sites from the same  
363 country only; Table S7), and the included observed covariates are some of the most well-known factors in  
364 the literature to frequently affect MPA placement and fish biomass (e.g., neighboring human population  
365 density (19, 28, 55, 56); Table S7).

## 366 **6 Study limitations**

367 We recognize that our sample does not represent a random selection of the global pool of MPAs given  
368 that we relied on open-source data or those shared by data managers. As a result, our sample mostly  
369 comprised data from tropical coral and temperate reef locations (Fig 1a). Limitations in management data  
370 methodologies and availability also confined some of our analyses to specific locations (e.g., offshore  
371 territories or countries receiving development funding) and thus inference (71, 72). As mentioned in  
372 Section 1, the absence of baseline and trend data due to data limitations can result in confounded  
373 estimates if all major observed and unobserved factors that contribute to site selection are not accounted  
374 for. Also, while exact matching and calipers reduced numerous observed and unobserved biases, the  
375 matching process also resulted in a considerable number of dropped observations (n=14-46% of  
376 treatment sites depending on the estimand). For example, there were countries/regions where only MPA  
377 sites were surveyed (e.g., Galápagos), and thus excluded from estimates of absolute impacts (NT:0 and  
378 MU:0) as no appropriate non-MPA match could be found. We examined whether the above limitations  
379 might have had a strong influence on our results (e.g., if post-matching subsamples were biased towards  
380 specific social, environment, or geographic contexts or whether treatment effects varied significantly  
381 between MPAs with and without management data). As expected, sub-sampling resulted in some  
382 geographic and contextual differences. For example, MPAs used to assess relative impacts were larger,  
383 younger, and further away from shore and population centers than those in the absolute impacts sample.  
384 However, given that relative impacts analysis directly matches sites by MPA type (e.g., matching remote  
385 no-take with remote multiple-use MPA sites) and not MPA and non-MPA sites, and that these covariates

386 have disparate effects on outcomes (4, 17, 73), how these covariate differences influences the results is  
387 not clear. Additionally, differences in sample sizes (and thus variation) made it not possible to determine  
388 if treatment effects differed between samples with or without management data. While sample selection  
389 bias is an issue in all observational studies (74) and our dataset is one of the largest of its kind, we do not  
390 claim that our results are representative of all MPAs, but for the MPAs in our sample. These MPAs are  
391 located in regions with high biodiversity, subject to multiple local and global stressors and thus represent  
392 high-priority areas for conservation (75–77). Further, we applied modeling approaches appropriate for  
393 unbalanced data (Section 4), accounting for confounding factors (Section 3), and for population-level  
394 inference based on samples (i.e., random-effects models; (Section 4) (67)).

395 **7**      **References**

396

- 397 1. J. Day, *et al.*, “Guidelines for applying the IUCN protected area management categories to marine  
398 protected areas. Second edition.” (IUCN, 2019).
- 399 2. IUCN-WCPA, “Establishing Marine Protected Area Networks—Making It Happen” (IUCN World  
400 Commission on Protected Areas (IUCN-WCPA), National Oceanic and Atmospheric  
401 Administration and The Nature Conservancy, 2008).
- 402 3. N. J. Bennett, P. Dearden, Why local people do not support conservation: Community perceptions  
403 of marine protected area livelihood impacts, governance and management in Thailand. *Marine*  
404 *Policy* **44**, 107–116 (2014).
- 405 4. G. J. Edgar, *et al.*, Global conservation outcomes depend on marine protected areas with five key  
406 features. *Nature* **506**, 216–220 (2014).
- 407 5. W. J. Fletcher, R. E. Kearney, B. S. Wise, W. J. Nash, Large-scale expansion of no-take closures  
408 within the Great Barrier Reef has not enhanced fishery production. *Ecological Applications* **25**,  
409 1187–1196 (2015).
- 410 6. D. A. Gill, *et al.*, Capacity shortfalls hinder the performance of marine protected areas globally.  
411 *Nature* **543**, 665–669 (2017).
- 412 7. K. Grorud-Colvert, *et al.*, The MPA Guide: A framework to achieve global goals for the ocean.  
413 *Science* **373**, eabf0861 (2021).
- 414 8. M. J. Rees, *et al.*, Accounting for habitat structural complexity improves the assessment of  
415 performance in no-take marine reserves. *Biological Conservation* **224**, 100–110 (2018).
- 416 9. R. Devillers, *et al.*, Reinventing residual reserves in the sea: are we favouring ease of  
417 establishment over need for protection? *Aquatic Conservation: Marine and Freshwater*  
418 *Ecosystems* **25**, 480–504 (2015).
- 419 10. C. Osenberg, J. Shima, S. Miller, A. Stier, “Assessing effects of marine protected areas:  
420 confounding in space and possible solutions” in *Marine Protected Areas: A Multidisciplinary*  
421 *Approach*, J. Claudet, Ed. (Cambridge University Press, 2011), pp. 143–167.
- 422 11. L. T. Toth, *et al.*, Do no-take reserves benefit Florida’s corals? 14 years of change and stasis in the  
423 Florida Keys National Marine Sanctuary. *Coral Reefs* **33**, 565–577 (2014).
- 424 12. S. K. Wilson, *et al.*, Relative and combined effects of habitat and fishing on reef fish communities  
425 across a limited fishing gradient at Ningaloo. *Marine environmental research* **81**, 1–11 (2012).
- 426 13. P. J. Ferraro, *et al.*, More strictly protected areas are not necessarily more protective: evidence  
427 from Bolivia, Costa Rica, Indonesia, and Thailand. *Environmental Research Letters* **8**, 025011  
428 (2013).

- 429 14. L. N. Joppa, A. Pfaff, High and Far: Biases in the Location of Protected Areas. *PLoS ONE* **4**, e8273  
430 (2009).
- 431 15. K. a. Karr, *et al.*, Thresholds in Caribbean coral reefs: implications for ecosystem-based fishery  
432 management. *Journal of Applied Ecology* **52**, 402–412 (2015).
- 433 16. J.-B. Jouffray, *et al.*, Parsing human and biophysical drivers of coral reef regimes. *Proceedings of*  
434 *the Royal Society B: Biological Sciences* **286**, 20182544 (2019).
- 435 17. J. E. Cinner, *et al.*, Gravity of human impacts mediates coral reef conservation gains. *Proceedings*  
436 *of the National Academy of Sciences* **115**, E6116–E6125 (2018).
- 437 18. G. P. Fioravanti, J. F. Valentine, Impacts of reef architecture and fishing on food webs in back reef  
438 environments of the upper Florida Keys National Marine Sanctuary. *Florida Scientist* **70**, 18  
439 (2007).
- 440 19. A. M. Friedlander, E. K. Brown, P. L. Jokiel, W. R. Smith, K. S. Rodgers, Effects of habitat, wave  
441 exposure, and marine protected area status on coral reef fish assemblages in the Hawaiian  
442 archipelago. *Coral Reefs* **22**, 291–305 (2003).
- 443 20. I. D. Williams, *et al.*, Differences in Reef Fish Assemblages between Populated and Remote Reefs  
444 Spanning Multiple Archipelagos Across the Central and Western Pacific. *Journal of Marine Biology*  
445 **2011**, 1–14 (2011).
- 446 21. G. N. Ahmadi, *et al.*, Integrating impact evaluation in the design and implementation of  
447 monitoring marine protected areas. *Philosophical Transactions of the Royal Society B: Biological*  
448 *Sciences* **370**, 20140275 (2015).
- 449 22. P. J. Ferraro, J. N. Sanchirico, M. D. Smith, Causal inference in coupled human and natural  
450 systems. *Proceedings of the National Academy of Sciences* **116**, 201805563 (2018).
- 451 23. R. A. Abesamis, A. L. Green, G. R. Russ, C. R. L. Jadloc, The intrinsic vulnerability to fishing of coral  
452 reef fishes and their differential recovery in fishery closures. *Reviews in Fish Biology and Fisheries*  
453 **24**, 1033–1063 (2014).
- 454 24. A. K. Cresswell, *et al.*, Disentangling the response of fishes to recreational fishing over 30 years  
455 within a fringing coral reef reserve network. *Biological Conservation* **237**, 514–524 (2019).
- 456 25. P. R. Rosenbaum, *Design of Observational Studies* (Springer, 2010).
- 457 26. Gill, David A, OSF | Relative impacts of NT and fished MPAs; <https://osf.io/pxrf8/>. *Open Science*  
458 *Framework* (2019) (May 1, 2019).
- 459 27. R. Froese, D. Pauly, Fishbase. *World Wide Web electronic publication* (2010) (December 1, 2010).
- 460 28. T. R. McClanahan, Biogeography versus resource management: how do they compare when  
461 prioritizing the management of coral reef fish in the south-western Indian Ocean? *Journal of*  
462 *Biogeography* **42**, 2414–2426 (2015).

- 463 29. K. L. Nash, N. A. J. Graham, Ecological indicators for coral reef fisheries management. *Fish and*  
464 *Fisheries* **17**, 1029–1054 (2016).
- 465 30. T. R. McClanahan, Community biomass and life history benchmarks for coral reef fisheries. *Fish*  
466 *and Fisheries* **19**, 471–488 (2018).
- 467 31. S. K. Wilson, *et al.*, Habitat degradation and fishing effects on the size structure of coral reef fish  
468 communities. *Ecological Applications* **20**, 442–451 (2010).
- 469 32. L. Thiault, *et al.*, Ecological evaluation of a marine protected area network: a progressive-change  
470 BACIPS approach. *Ecosphere* **10**, e02576 (2019).
- 471 33. J. a. García-Charton, *et al.*, Multi-scale spatial heterogeneity, habitat structure, and the effect of  
472 marine reserves on Western Mediterranean rocky reef fish assemblages. *Marine Biology* **144**,  
473 161–182 (2004).
- 474 34. V. Stelzenmüller, F. Maynou, P. Martín, Spatial assessment of benefits of a coastal Mediterranean  
475 Marine Protected Area. *Biological Conservation* **136**, 571–583 (2007).
- 476 35. IUCN and UNEP-WCMC, The World Database on Protected Areas (WDPA). Accessed April 2019  
477 (2019) (April 21, 2019).
- 478 36. TNC, CAMPAM, CaribbeanMPA: A database of the Wider Caribbean’s marine protected areas  
479 (2014).
- 480 37. NOAA, The Marine Protected Areas Inventory (2014).
- 481 38. Healthy Reefs, Healthy Reefs Eco-Audit data and maps (2014).
- 482 39. Dept. of Environment, Collaborative Australian Protected Areas Database (CAPAD) (2016).
- 483 40. Marine Conservation Institute, MPAtlas (2015) (November 17, 2015).
- 484 41. J. Geldmann, *et al.*, Changes in protected area management effectiveness over time: A global  
485 analysis. *Biological Conservation* **191**, 692–699 (2015).
- 486 42. S. Stolton, *et al.*, “Management Effectiveness Tracking Tool: Reporting progress in Protected  
487 areas sites; second edition” (World Bank/WWF Forest Alliance and WWF, 2007).
- 488 43. F. Staub, M. E. Hatzios, “Score Card to Assess Progress in Achieving Management effectiveness  
489 goals for Marine Protected Areas” (Prepared for the World Bank, 2004).
- 490 44. NOAA, “NOAA Coral Reef Conservation Program MPA Management Assessment Checklist”  
491 (National Oceanic and Atmospheric Administration (NOAA), 2010).
- 492 45. M. Gombos, *et al.*, “A Management Capacity Assessment of Selected Coral Reef Marine Protected  
493 Areas in the Caribbean” (Commissioned by the National Oceanic and Atmospheric Administration  
494 (NOAA) Coral Reef Conservation Program (CRCP), the Gulf and Caribbean Fisheries Institute

495 (GCFI) and by the UNEP-CEP Caribbean Marine Protected Area Management Network and Forum  
496 (CaMPAM), 2011).

497 46. M. B. Mascia, "Social Dimensions of Marine Reserves" in *Marine Reserves: A Guide to Science,*  
498 *Design, and Use*, J. Sobel, C. Dahlgren, Eds. (Island Press, 2004), pp. 164–186.

499 47. E. Ostrom, *Governing the commons: the evolution of institutions for collective action* (Cambridge  
500 University Press, 1990).

501 48. C. Scianna, F. Niccolini, S. D. Gaines, P. Guidetti, 'Organization Science': A new prospective to  
502 assess marine protected areas effectiveness. *Ocean & Coastal Management* **116**, 443–448 (2015).

503 49. R. A. Rasolofoson, P. J. Ferraro, C. N. Jenkins, J. P. G. Jones, Effectiveness of Community Forest  
504 Management at reducing deforestation in Madagascar. *Biological Conservation* **184**, 271–277  
505 (2015).

506 50. J. S. Sekhon, Multivariate and Propensity Score Matching. *Journal of Statistical Software* **42**, 1–52  
507 (2011).

508 51. P. J. Ferraro, M. M. Hanauer, Advances in Measuring the Environmental and Social Impacts of  
509 Environmental Programs. *Annual Review of Environment and Resources* **39**, 495–517 (2014).

510 52. J. S. Sekhon, Opiates for the Matches: Matching Methods for Causal Inference. *Annual Review of*  
511 *Political Science* **12**, 487–508 (2009).

512 53. J. S. Sekhon, Multivariate and Propensity Score Matching Software with Automated Balance  
513 Optimization: The Matching Package for R (version 4.9-6). *Journal of Statistical Software* **42**, 1–52  
514 (2011).

515 54. M. Caliendo, S. Kopeinig, Some Practical Guidance for the Implementation of Propensity Score  
516 Matching. *Journal of Economic Surveys* **22**, 31–72 (2005).

517 55. T. D. Brewer, J. E. Cinner, a Green, R. L. Pressey, Effects of human population density and  
518 proximity to markets on coral reef fishes vulnerable to extinction by fishing. *Conservation*  
519 *biology : the journal of the Society for Conservation Biology* **27**, 443–52 (2013).

520 56. J. E. Cinner, N. A. J. Graham, C. Huchery, M. A. Macneil, Global effects of local human population  
521 density and distance to markets on the condition of coral reef fisheries. *Conservation Biology* **27**,  
522 453–8 (2013).

523 57. E. A. Stuart, Matching Methods for Causal Inference: A Review and a Look Forward. *Statist. Sci.*  
524 **25**, 1–21 (2010).

525 58. A. Abadie, G. W. Imbens, Bias-corrected matching estimators for average treatment effects.  
526 *Journal of Business and Economic Statistics* **29**, 1–11 (2011).

527 59. R. Y. Fidler, *et al.*, Participation, not penalties: Community involvement and equitable governance  
528 contribute to more effective multiuse protected areas. *Science Advances* **8**, eabl8929 (2022).

- 529 60. C. Strobl, A.-L. Boulesteix, T. Kneib, T. Augustin, A. Zeileis, Conditional Variable Importance for  
530 Random Forests. *BMC Bioinformatics* **9**, 307 (2008).
- 531 61. C. Strobl, J. Malley, G. Tutz, An introduction to recursive partitioning: rationale, application, and  
532 characteristics of classification and regression trees, bagging, and random forests. *Psychological*  
533 *methods* **14**, 323–348 (2009).
- 534 62. T. Hothorn, K. Hornik, A. Zeileis, Unbiased recursive partitioning: A conditional inference  
535 framework. *Journal of Computational and Graphical Statistics* **15**, 651–674 (2006).
- 536 63. D. R. Cutler, *et al.*, Random Forests for Classification In Ecology. *Ecology* **88**, 2783–2792 (2007).
- 537 64. A. Hapfelmeier, T. Hothorn, K. Ulm, C. Strobl, A new variable importance measure for random  
538 forests with missing data. *Statistics and Computing* **24**, 21–34 (2012).
- 539 65. J. Tibshirani, S. Athey, S. Wager, grf: Generalized Random Forests (2020).
- 540 66. M. Lu, S. Sadiq, D. J. Feaster, H. Ishwaran, Estimating Individual Treatment Effect in Observational  
541 Data Using Random Forest Methods. *Journal of Computational and Graphical Statistics* **27**, 209–  
542 219 (2018).
- 543 67. J. C. Pinheiro, D. M. Bates, *Mixed effects models in S and S-PLUS* (Springer Verlag, 2000).
- 544 68. M. Plummer, JAGS: A Program for Analysis of Bayesian Graphical Models using Gibbs Sampling.  
545 *3rd International Workshop on Distributed Statistical Computing (DSC 2003); Vienna, Austria* **124**  
546 (2003).
- 547 69. M. Plummer, A. Stukalov, M. Denwood, rjags: Bayesian Graphical Models using MCMC (2023)  
548 (July 13, 2023).
- 549 70. M. Blackwell, A Selection Bias Approach to Sensitivity Analysis for Causal Effects. *Polit. anal.* **22**,  
550 169–182 (2014).
- 551 71. C. N. Cook, R. W. (Bill) Carter, M. Hockings, Measuring the accuracy of management effectiveness  
552 evaluations of protected areas. *Journal of Environmental Management* **139**, 164–171 (2014).
- 553 72. C. N. Cook, M. Hockings, Opportunities for improving the rigor of management effectiveness  
554 evaluations in protected areas. *Conservation Letters* **4**, 372–382 (2011).
- 555 73. S. J. Campbell, *et al.*, Fishing restrictions and remoteness deliver conservation outcomes for  
556 Indonesia’s coral reef fisheries. *Conservation Letters* **13**, e12698 (2020).
- 557 74. D. E. Ho, K. Imai, G. King, E. a. Stuart, Matching as nonparametric preprocessing for reducing  
558 model dependence in parametric causal inference. *Political Analysis* **15**, 199–236 (2007).
- 559 75. L. Burke, M. Spalding, K. Reyntar, A. Perry, “Reefs at risk revisited” (World Resources Institute,  
560 2011).



- 561 76. T. P. Hughes, *et al.*, Spatial and temporal patterns of mass bleaching of corals in the  
562 Anthropocene. *Science* **359**, 80–83 (2018).
- 563 77. E. R. Selig, *et al.*, Global priorities for marine biodiversity conservation. *PLoS one* **9**, e82898 (2014).
- 564 78. Flanders Marine Institute, MarineRegions.org (2021) (October 17, 2017).
- 565 79. NCCOS, Benthic Habitat Mapping of Coral Reefs in Florida, Caribbean, and the Pacific; National  
566 Oceanic and Atmospheric Administration (NOAA) National Centers for Coastal Ocean Science  
567 (NCCOS) (2014) (April 20, 2006).
- 568 80. UNEP-WCMC, WorldFish Center, WRI, TNC, “Global distribution of coral reefs, compiled from  
569 multiple sources including the Millennium Coral Reef Mapping Project. Version 1.3.” (Includes  
570 contributions from IMaRS-USF and IRD (2005), IMaRSUSF (2005) and Spalding et al. (2001).  
571 Cambridge (UK): UNEP World Conservation Monitoring Centre., 2010).
- 572 81. L. Tyberghein, *et al.*, Bio-ORACLE: a global environmental dataset for marine species distribution  
573 modelling. *Global Ecology and Biogeography* **21**, 272–281 (2012).
- 574 82. SOEST, 50 Meter Bathymetry Grids (GMT and Arc). School of Ocean and Earth Science and  
575 Technology, University of Hawaii (2014) (September 5, 2014).
- 576 83. NOAA, U.S. Virgin Islands, VI 1 arc-second MHW DEM. National Oceanic and Atmospheric  
577 Administration (NOAA) National Centers for Environmental Information (NCEI) (2014) (September  
578 5, 2014).
- 579 84. NOAA, US Coastal Relief Model - Puerto Rico. National Oceanic and Atmospheric Administration  
580 (NOAA) National Centers for Environmental Information (NCEI) (2014) (September 5, 2014).
- 581 85. H. L. Tolman, “User manual and system documentation of WAVEWATCH III version 3.14,  
582 Technical Note” (U.S. Department of Commerce, National Oceanographic and Atmospheric  
583 Administration, National Weather Service, National Centers for Environmental Predictions, 2009).
- 584 86. P. Marchand, D. A. Gill, waver. Calculate fetch and wave exposure (R package) (2016).
- 585 87. M. D. Spalding, *et al.*, Marine Ecoregions of the World: A Bioregionalization of Coastal and Shelf  
586 Areas. *BioScience* **57**, 573–583 (2007).
- 587 88. P. Wessel, W. H. F. Smith, A global, self-consistent, hierarchical, high-resolution shoreline  
588 database. *Journal of Geophysical Research* **101**, 8741 (1996).
- 589 89. CIESIN, CIAT, Center for International Earth Science Information Network - CIESIN - Columbia  
590 University, and Centro Internacional de Agricultura Tropical - CIAT. 2005. Gridded Population of  
591 the World, Version 3 (GPWv3): Population Density Grid. Palisades, NY: NASA Soci (2014)  
592 <https://doi.org/dx.doi.org/10.7927/H4XK8CG2> (August 9, 2014).
- 593 90. ESRI, World Cities. Esri Geographic Information System company (2015) (March 6, 2015).

- 594 91. M. D. Spalding, I. Meliane, A. Milam, C. Fitzgerald, L. Z. Hale, Protecting Marine Spaces: Global  
595 Targets and Changing Approaches. *Ocean Yearbook 27*, 213–248 (2013).
- 596 92. G. P. Jones, C. Syms, Disturbance, habitat structure and the ecology of fishes on coral reefs.  
597 *Austral Ecology* **23**, 287–297 (1998).
- 598 93. D. Pelletier, D. Mallet, A. Powel, W. Roman, “Disentangling the Effects of Habitat and Protection  
599 on Coral Reef Fish Communities in Long-Established Marine Reserves” in *Formal Methods in*  
600 *Macro-Biology*, (2014), pp. 156–158.
- 601 94. S. Williams, P. Mumby, I. Chollett, J. Cortés, Importance of differentiating *Orbicella* reefs from  
602 gorgonian plains for ecological assessments of Caribbean reefs. *Marine Ecology Progress Series*  
603 **530**, 93–101 (2015).
- 604 95. M. Dallimer, N. Strange, Why socio-political borders and boundaries matter in conservation.  
605 *Trends in Ecology & Evolution* **30**, 1–8 (2015).
- 606 96. M. O. Nadon, *et al.*, Re-Creating Missing Population Baselines for Pacific Reef Sharks.  
607 *Conservation Biology* **26**, 493–503 (2012).
- 608 97. J. M. Gove, *et al.*, Quantifying Climatological Ranges and Anomalies for Pacific Coral Reef  
609 Ecosystems. *PLoS ONE* **8**, e61974 (2013).
- 610 98. J. D. Bell, Effects of Depth and Marine Reserve Fishing Restrictions on the Structure of a Rocky  
611 Reef Fish Assemblage in the North-Western Mediterranean Sea. *Journal of Applied Ecology* **20**,  
612 357–369 (1983).
- 613 99. I. Chollett, P. J. Mumby, Predicting the distribution of *Montastraea* reefs using wave exposure.  
614 *Coral Reefs* **31**, 493–503 (2012).
- 615 100. N. T. Shears, R. C. Babcock, A. K. Salomon, Context-Dependent Effects of Fishing: Variation in  
616 Trophic Cascades across Environmental Gradients. *Ecological Applications* **18**, 1860–1873 (2008).
- 617 101. I. Chollett, S. W. J. Canty, S. J. Box, P. J. Mumby, Adapting to the impacts of global change on an  
618 artisanal coral reef fishery. *Ecological Economics* **102**, 118–125 (2014).
- 619 102. F. Bastardie, J. R. Nielsen, B. S. Andersen, O. R. Eigaard, Integrating individual trip planning in  
620 energy efficiency - Building decision tree models for Danish fisheries. *Fisheries Research* **143**,  
621 119–130 (2013).
- 622 103. J. E. Wilen, M. D. Smith, D. Lockwood, L. W. Botsford, Avoiding surprises: incorporating fisherman  
623 behavior into management models. *Bulletin of Marine Science* **70**, 553–575 (2002).
- 624 104. A. C. Haynie, L. Pfeiffer, Why economics matters for understanding the effects of climate change  
625 on fisheries. *ICES Journal of Marine Science* **69**, 1160–1167 (2012).
- 626 105. K. Newton, I. M. Côté, G. M. Pilling, S. Jennings, N. K. Dulvy, Current and future sustainability of  
627 island coral reef fisheries. *Current Biology* **17**, 655–658 (2007).

- 628 106. S. Advani, L. N. Rix, D. M. Aherne, M. A. Alwany, D. M. Bailey, Distance from a fishing community  
629 explains fish abundance in a no-take zone with weak compliance. *PLoS ONE* **10**, e0126098 (2015).
- 630 107. A. R. Harborne, *et al.*, Modelling and mapping regional-scale patterns of fishing impact and fish  
631 stocks to support coral-reef management in Micronesia. *Diversity and Distributions* **24**, 1729–  
632 1743 (2018).
- 633 108. J. Claudet, *et al.*, Marine reserves: size and age do matter. *Ecology Letters* **11**, 481–489 (2008).
- 634

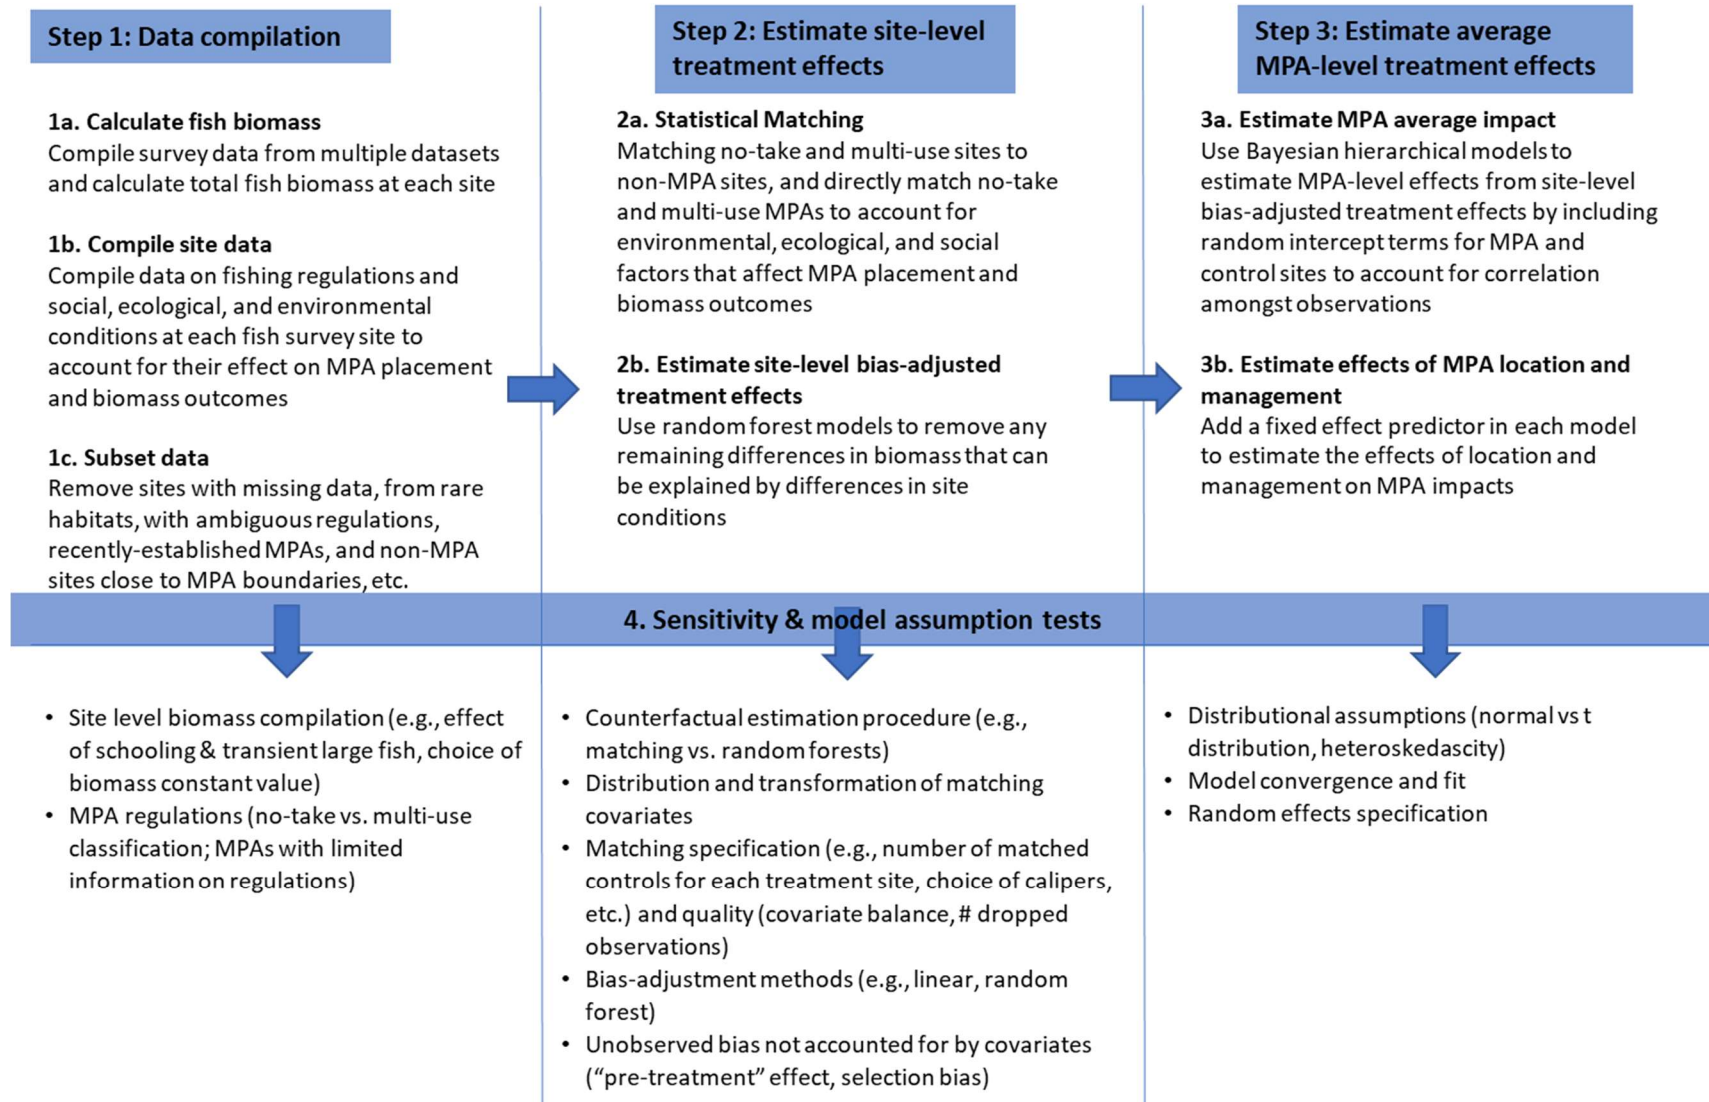

635  
636  
637

**Fig. S1 | Major analytical steps and diagnostic tests used in this study.** Step 4 (lower panels) show the sensitivity and model assumptions tests conducted in association with each of the three steps.

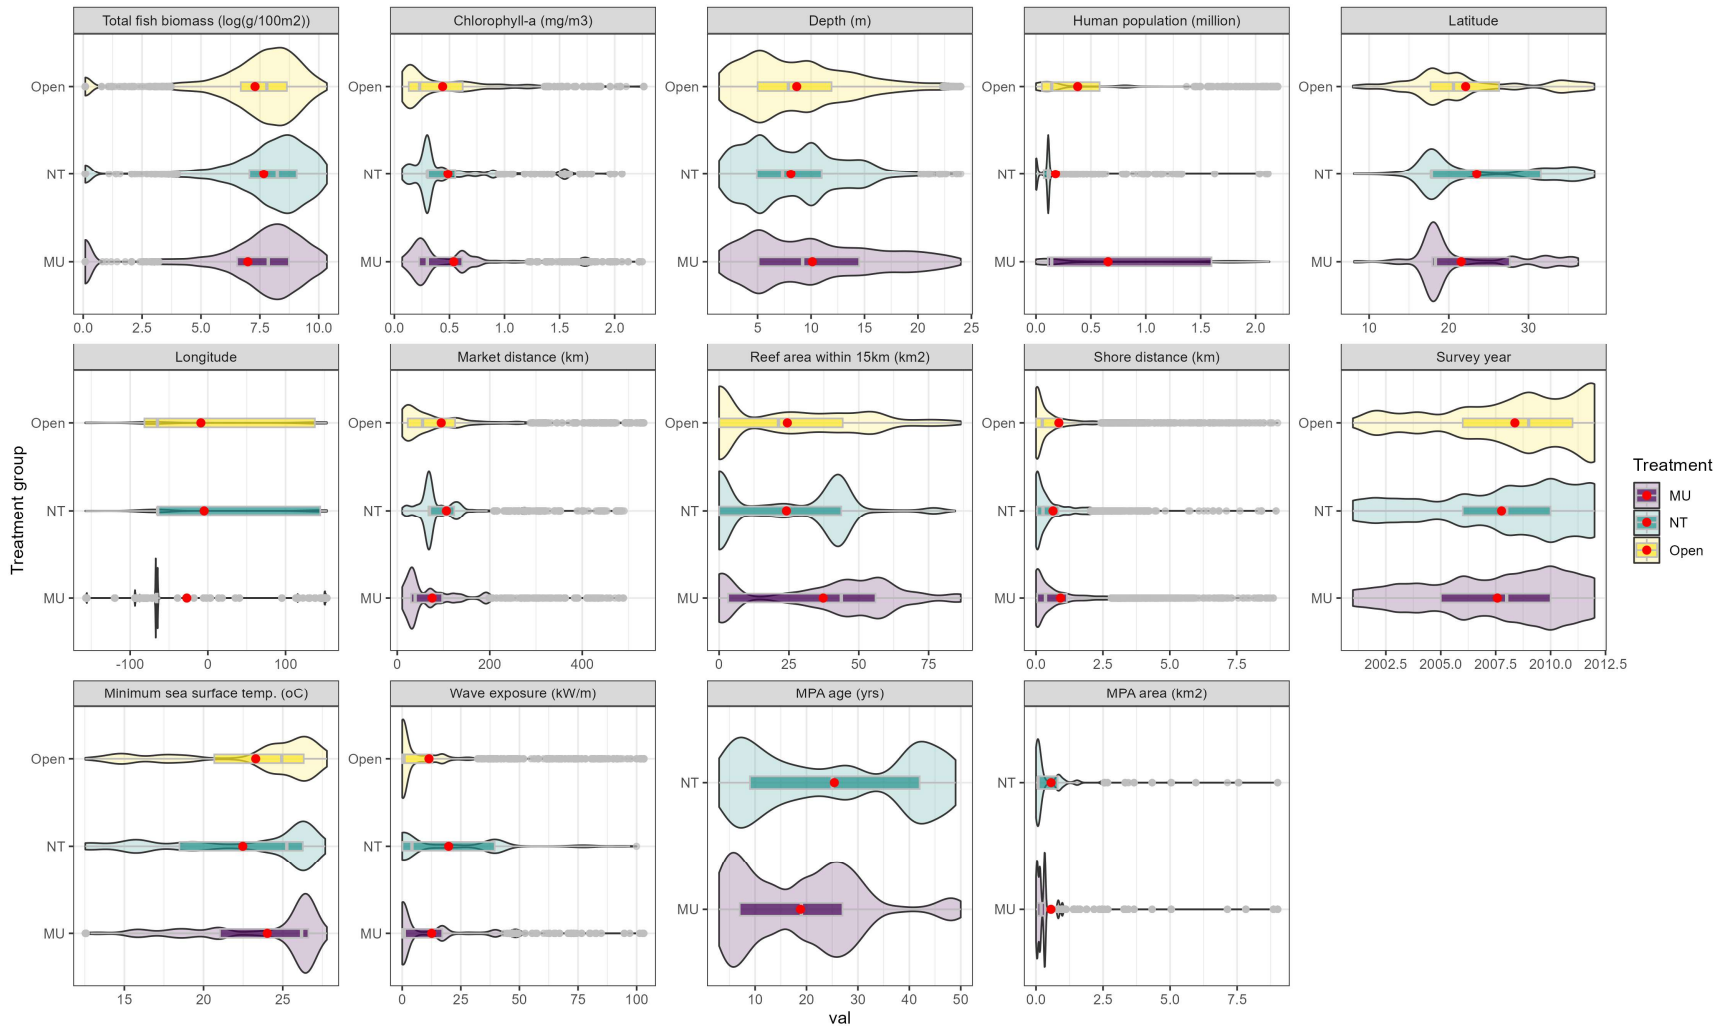

638

639 **Fig. S2 | Covariate distribution by treatment group: MU: multiple-use, NT: no-take, and Open: non-MPA sites (n= 14,044 sites).** Box represents the lower  
 640 (25%) and upper (75%) quantile. Mean (red dot), median (vertical line in box), and 1.5 times the interquartile range (horizontal line) also shown. For  
 641 visualization purposes, plots exclude observations below the 5<sup>th</sup> and above the 95<sup>th</sup> percentiles. See Table S3 variable descriptions.

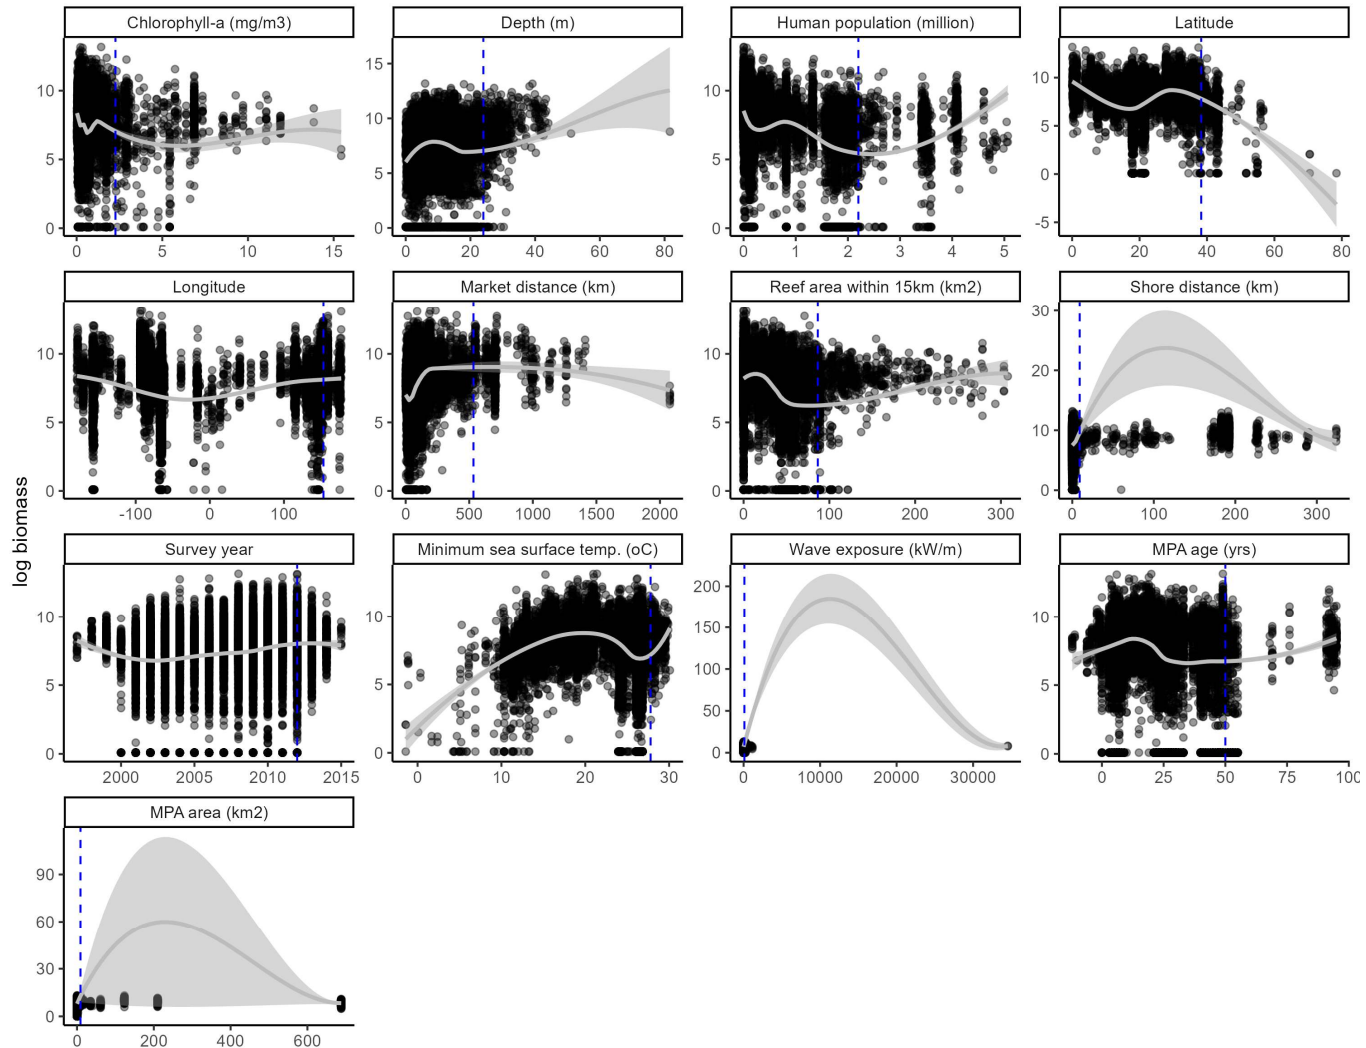

**Fig. S3 | Relationship between fish biomass (log) and matching covariates (n= 14,044 sites).** Included are smoothed LOESS lines (grey line) along with the standard error regions (shaded grey area). Dashed vertical blue lines represent the 95<sup>th</sup> percentile. See Table S3 variable descriptions.

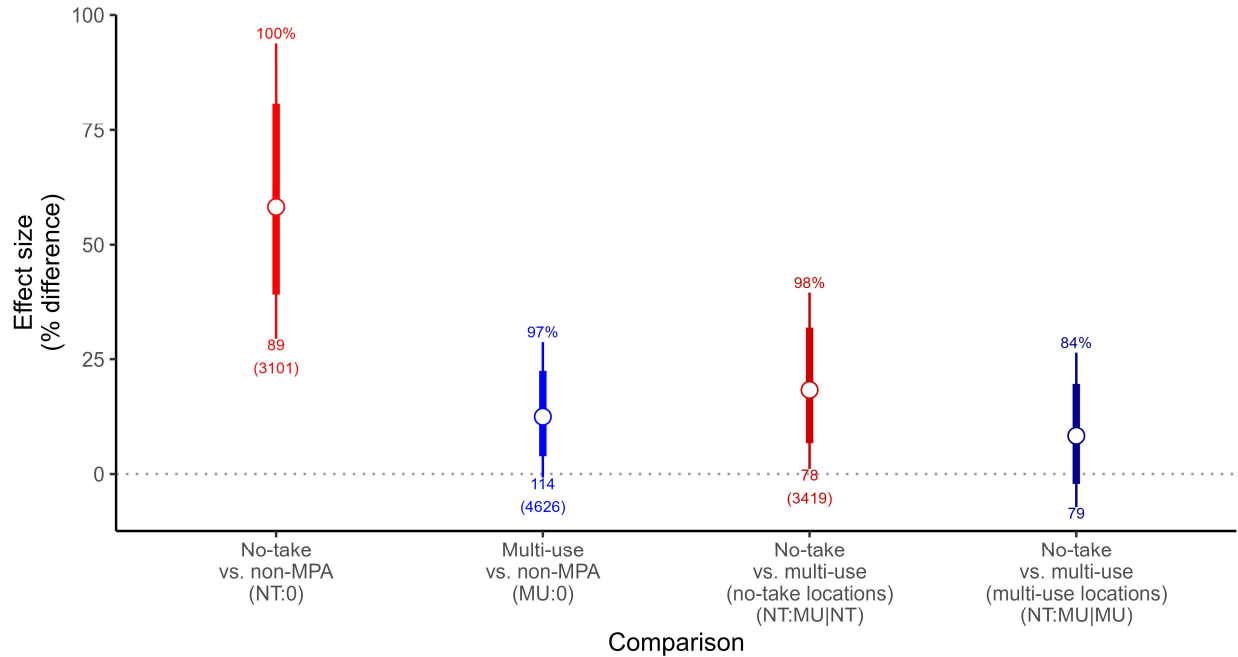

**Fig. S4 | Absolute and relative no-take and multiple-use MPA impacts.** Effect sizes of the expected difference in total fish biomass in percent differences, comparing biomass in no-take (left, red) and multiple-use (second left, blue) MPA sites to unprotected sites, no-take to counterfactual multiple-use MPA sites in no-take locations (second right, dark-red), and multiple-use to counterfactual no-take MPA sites in multiple-use locations (right, dark-blue) (Table S6). Greater values in the relative impact estimates (second right and right) represent larger expected biomass increases from converting to no-take restrictions. Thick and thin lines show the 80% and 95% credible intervals, respectively, around the median effect size (white dot). Probability of positive effects are shown above the estimates and number of MPAs (and number of sites, in parentheses) are shown below estimates. Percent differences were calculated using modelled response ratios (Table S9; Equation 3). NT:MU|MU model estimates (right; dark blue) generated as MU-NT but converted to NT-MU by multiplying by -1 for easier interpretation.

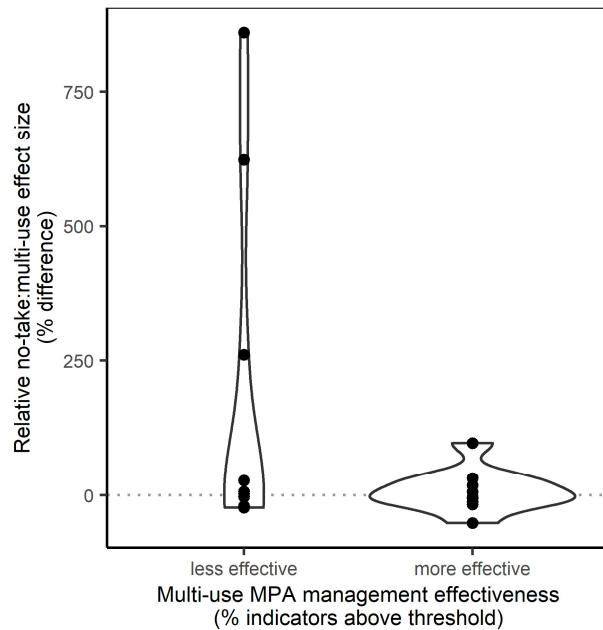

**Fig. S5 | Relative no-take:multiple-use MPA impacts versus management effectiveness of multiple-use MPAs within high pressure locations (<100 km from population center).** Effect sizes represent the expected difference in total fish biomass from converting existing multiple-use to no-take MPAs where greater values represent larger expected biomass increases from converting to no-take restrictions (n=19 MPAs). Management effectiveness values (x-axis) represent multiple-use MPAs where fewer (less effective) or more (more effective) than half of ten management effectiveness indicators exceed the indicator thresholds for adequate and appropriate management. Management effectiveness indicators were staff capacity, sustainable-use regulations, budget capacity, management plan implementation, monitoring activities, enforcement capacity, inclusive decision making, devolution of management authority, level of legislative support, and MPA boundary delineation. See Gill et al (6) and Table S4 for more details on indicators and indicator thresholds.



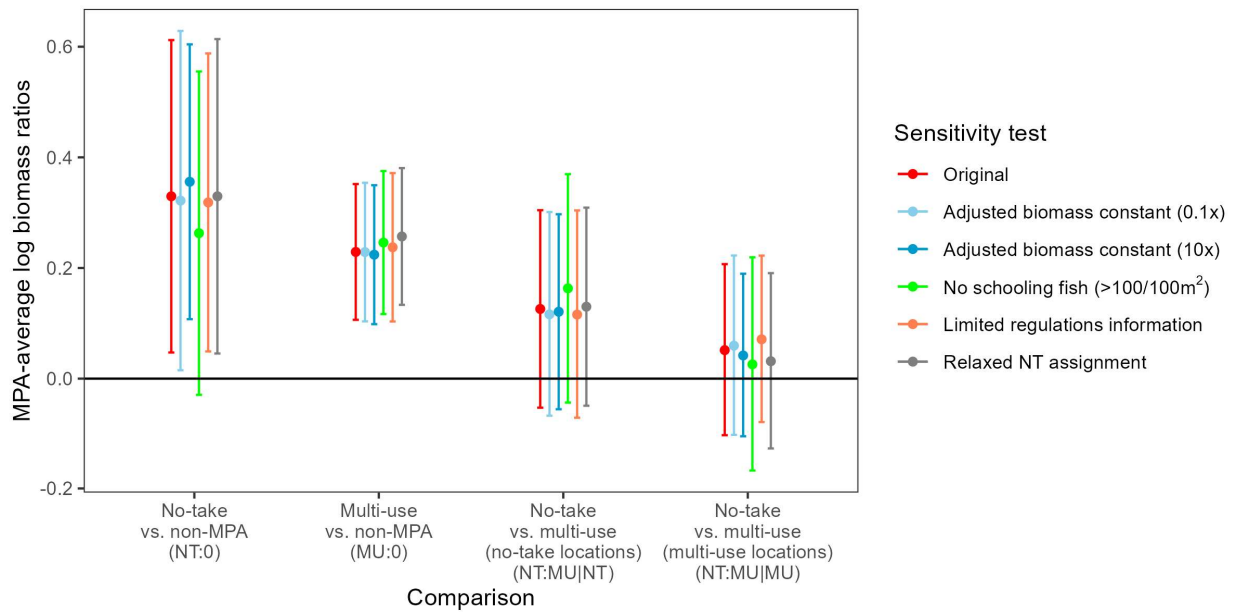

**Fig. S6 | Fish biomass compilation sensitivity tests.** Plot shows (unmodelled) MPA average logged biomass ratios based on original data (red); Adjusted biomass constant: changing the magnitude of the constant biomass value (i.e., minimum fish biomass observed in dataset) added to each site's total biomass to avoid calculating log ratios with zero values (0.1 and 10 times minimum fish biomass value; light and dark blue respectively); No schooling fish (green): removing all records with schools of fish (i.e., >100 individuals per 100m<sup>2</sup>); Limited regulations information (orange): removing sites where two sources of regulations information could not be obtained; Relaxed NT assignment (grey): relaxing stringent requirement that no-take sites (as designated by the data provider) be re-categorized as multiple-use if some low-level fishing allowed. See Table S6 for comparison descriptions.

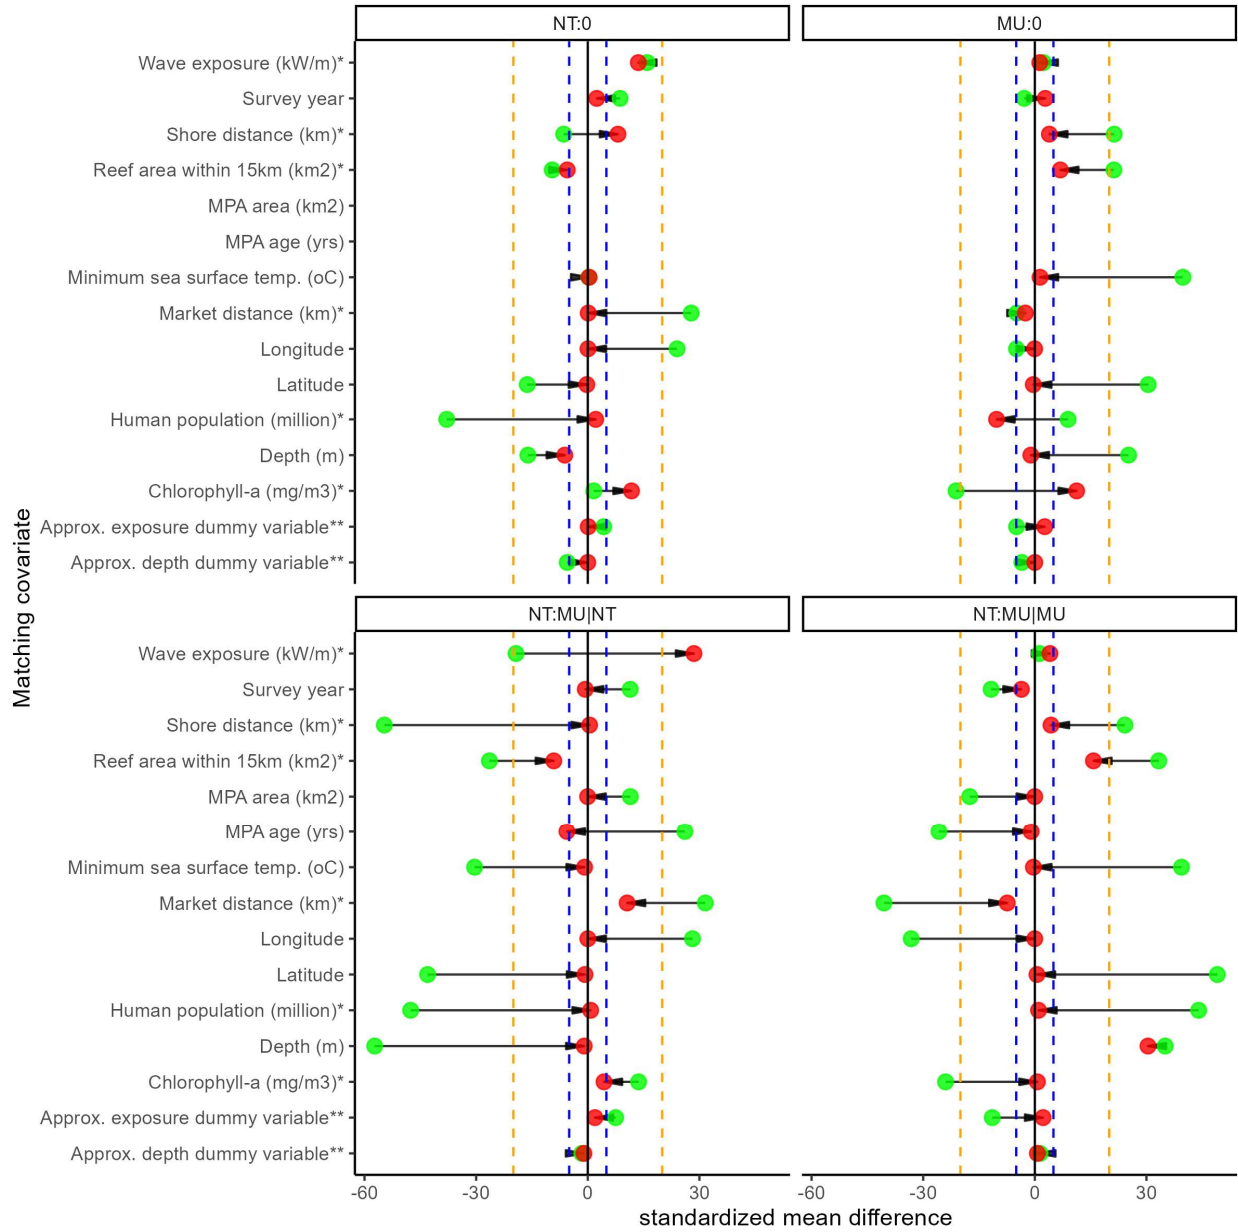

**Fig. S7 | Standardized mean difference between treated and control values before (green) and after (red) matching for each matching covariate and each of the four comparisons.** Blue and orange vertical dashed lines represent a standardized mean difference of 5% and 20% respectively. See Tables S3 and S7 for covariate descriptions and Table S6 for comparison descriptions.

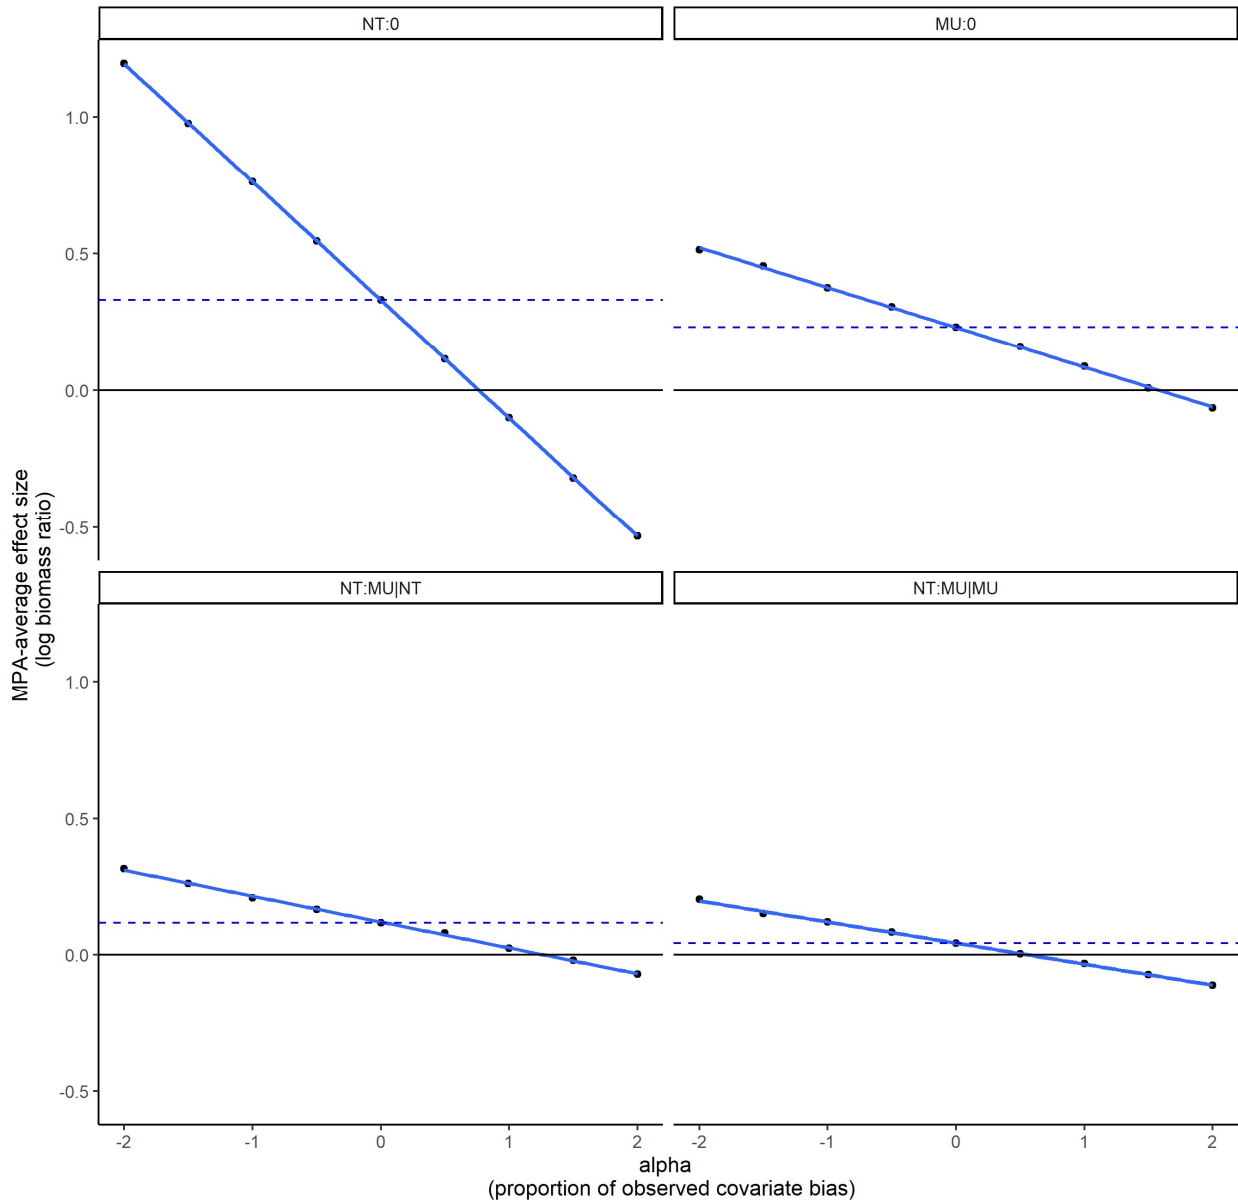

**Fig. S8 | Sensitivity of MPA treatment effects to increasing and decreasing amounts of hypothetical confounding (alpha) on counterfactual control outcomes.** Alpha values represent multiples of the difference in fish biomass outcomes between control and treatment sites that can be explained by the remaining post-matching differences in covariates. Here alpha values were added to the observed counterfactual biomass. Vertical axes represent the (unmodelled) MPA average treatment effects (i.e., average bias-adjusted logged biomass ratios) and the horizontal dashed blue lines show the estimates without hypothetical confounding (i.e., alpha = 0). Negative alpha values suggest that treated sites are placed in locations that inherently have greater fish biomass than control locations and visa versa. See Table S6 for comparison descriptions.

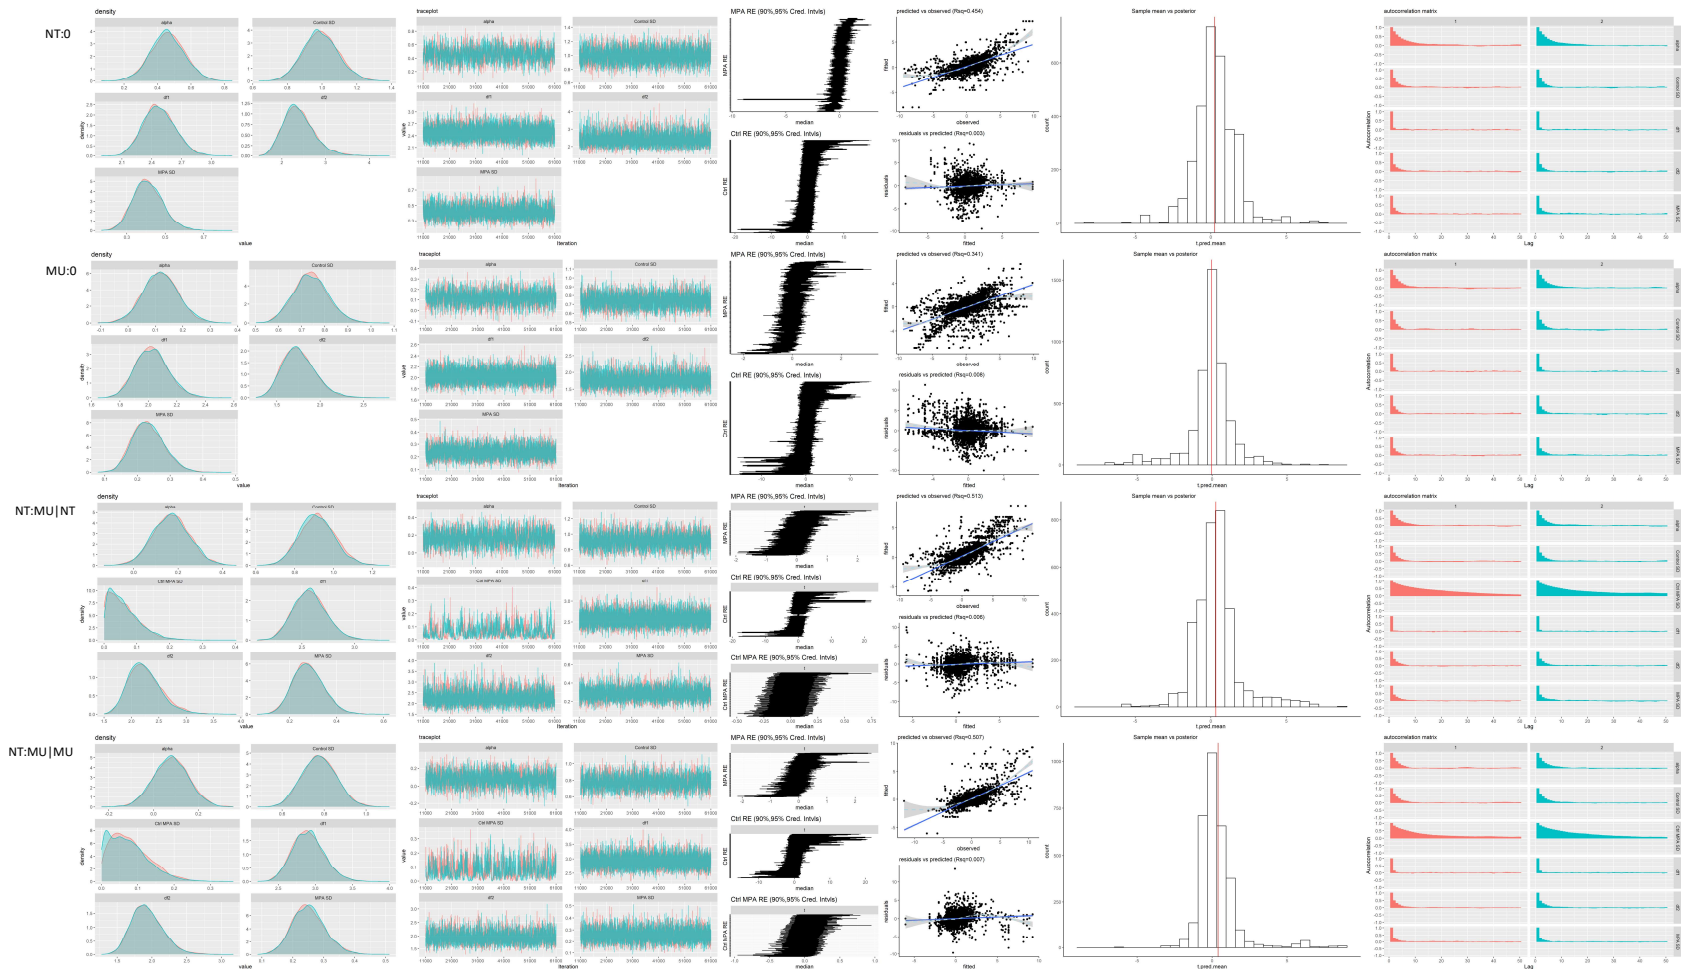

**Fig. S9 | Diagnostic plots for Bayesian linear models of MPA-level impacts on fish biomass (log response ratios) for models without fixed effect covariate predictors.** Plots (from left to right) include density and trace plots for each model parameter; caterpillar plots of MPA, matched control (Ctrl) site, and matched control site MPA random effects (RE); predicted vs. observed and residual vs. predicted scatter plots; sample mean (red vertical line) vs. posterior distribution plots; and auto-correlation plots for each model parameter (rows) and chain (columns). The four rows represent the results for the NT:0, MU:0, NT:MU|NT, and NT:MU|MU models respectively (Table S6).

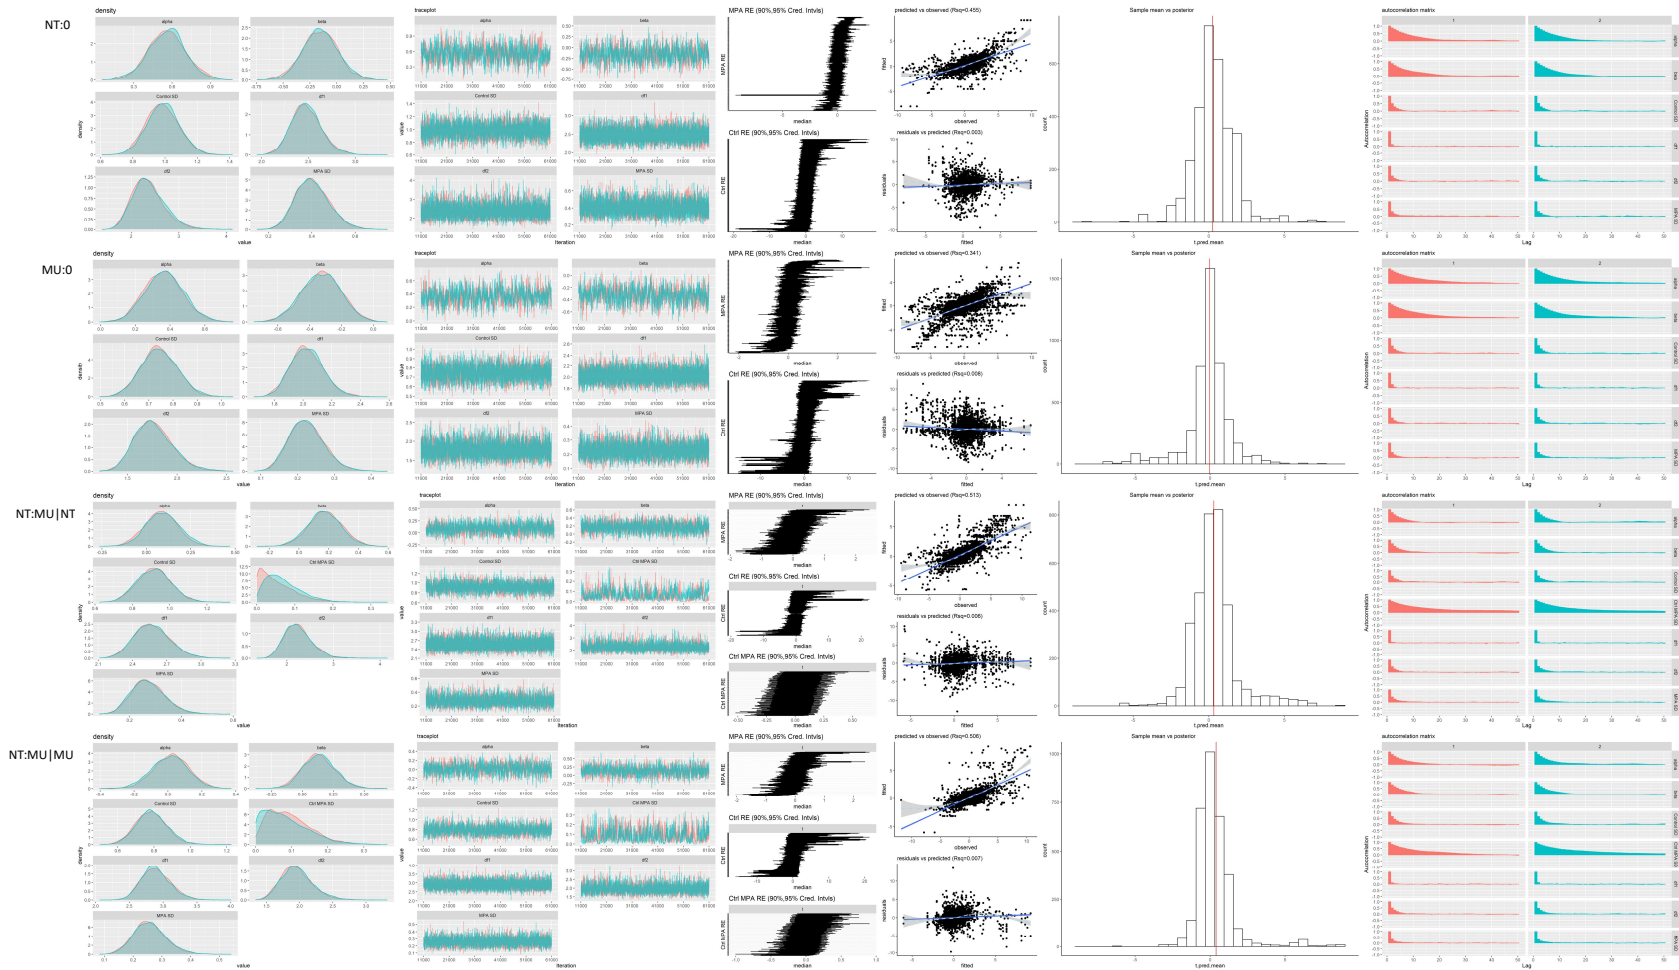

**Fig. S10 | Diagnostic plots for Bayesian linear models of MPA-level impacts on fish biomass (log response ratios) by population center distance.** Plots (from left to right) include density and trace plots for each model parameter; caterpillar plots of MPA, matched control (Ctrl) site, and matched control site MPA random effects (RE); predicted vs. observed and residual vs. predicted scatter plots; sample mean (red vertical line) vs. posterior distribution plots; and auto-correlation plots for each model parameter (rows) and chain (columns). The four rows represent the results for the NT:0, MU:0, NT:MU|NT, and NT:MU|MU models respectively (Table S6).

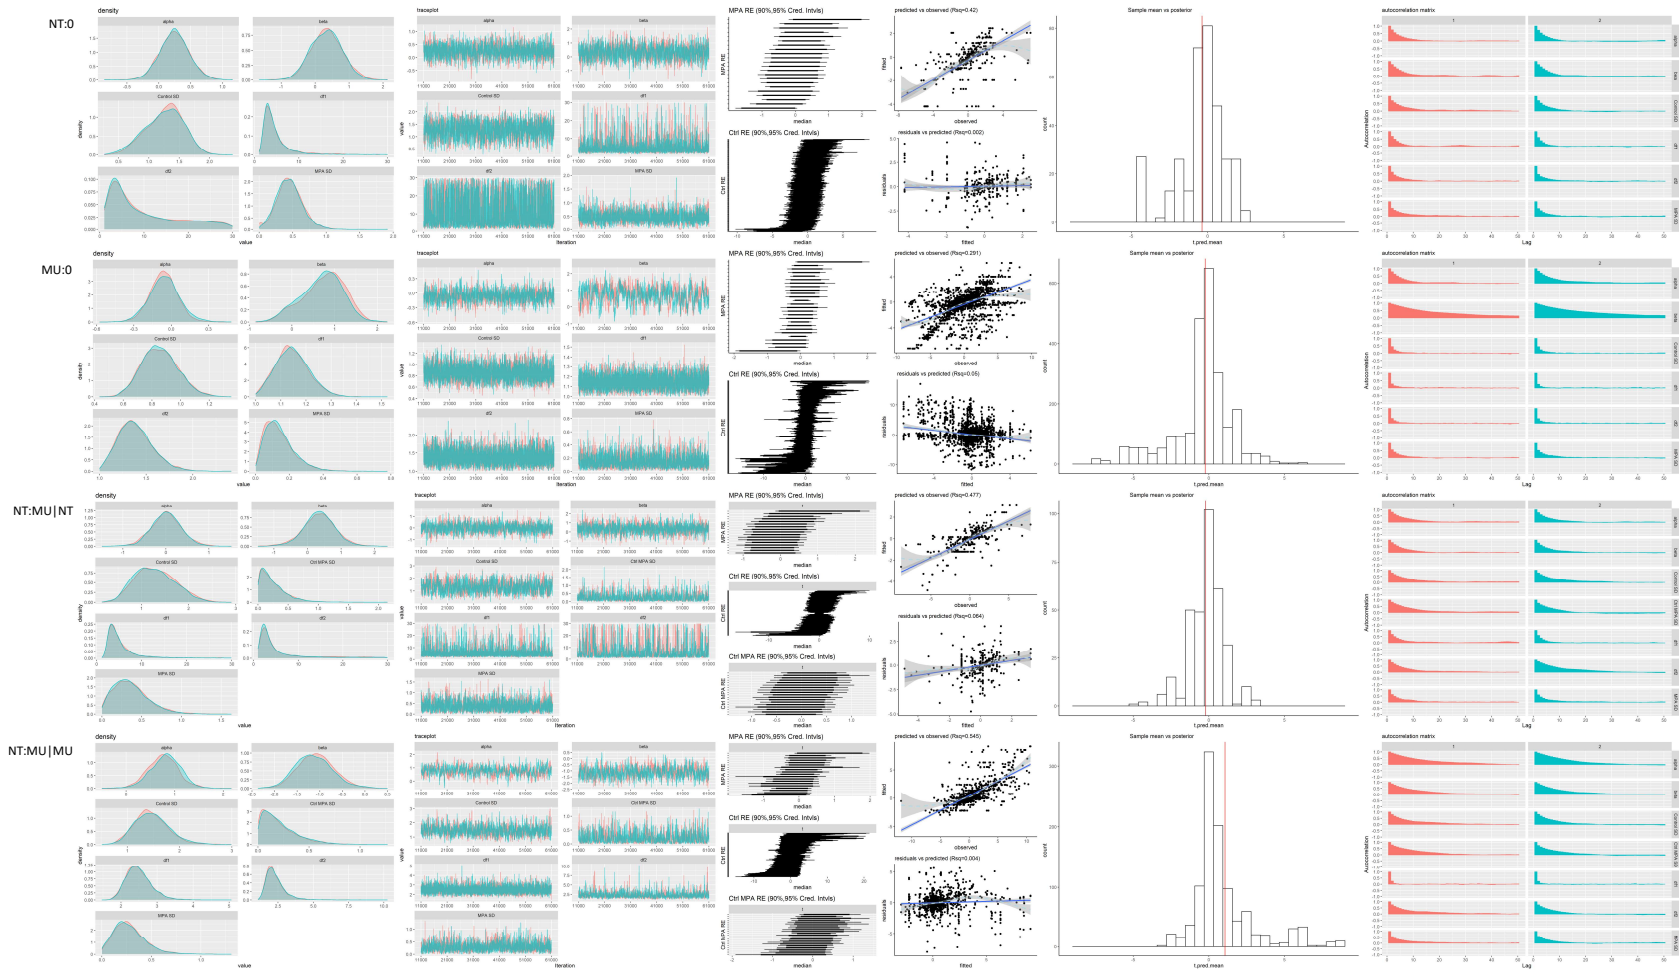

**Fig. S11 | Diagnostic plots for Bayesian linear models of MPA-level impacts on fish biomass (log response ratios) by staff capacity.** Plots (from left to right) include density and trace plots for each model parameter; caterpillar plots of MPA, matched control (Ctrl) site, and matched control site MPA random effects (RE); predicted vs. observed and residual vs. predicted scatter plots; sample mean (red vertical line) vs. posterior distribution plots; and auto-correlation plots for each model parameter (rows) and chain (columns). The four rows represent the results for the NT:0, MU:0, NT:MU|NT, and NT:MU|MU models respectively (Table S6).

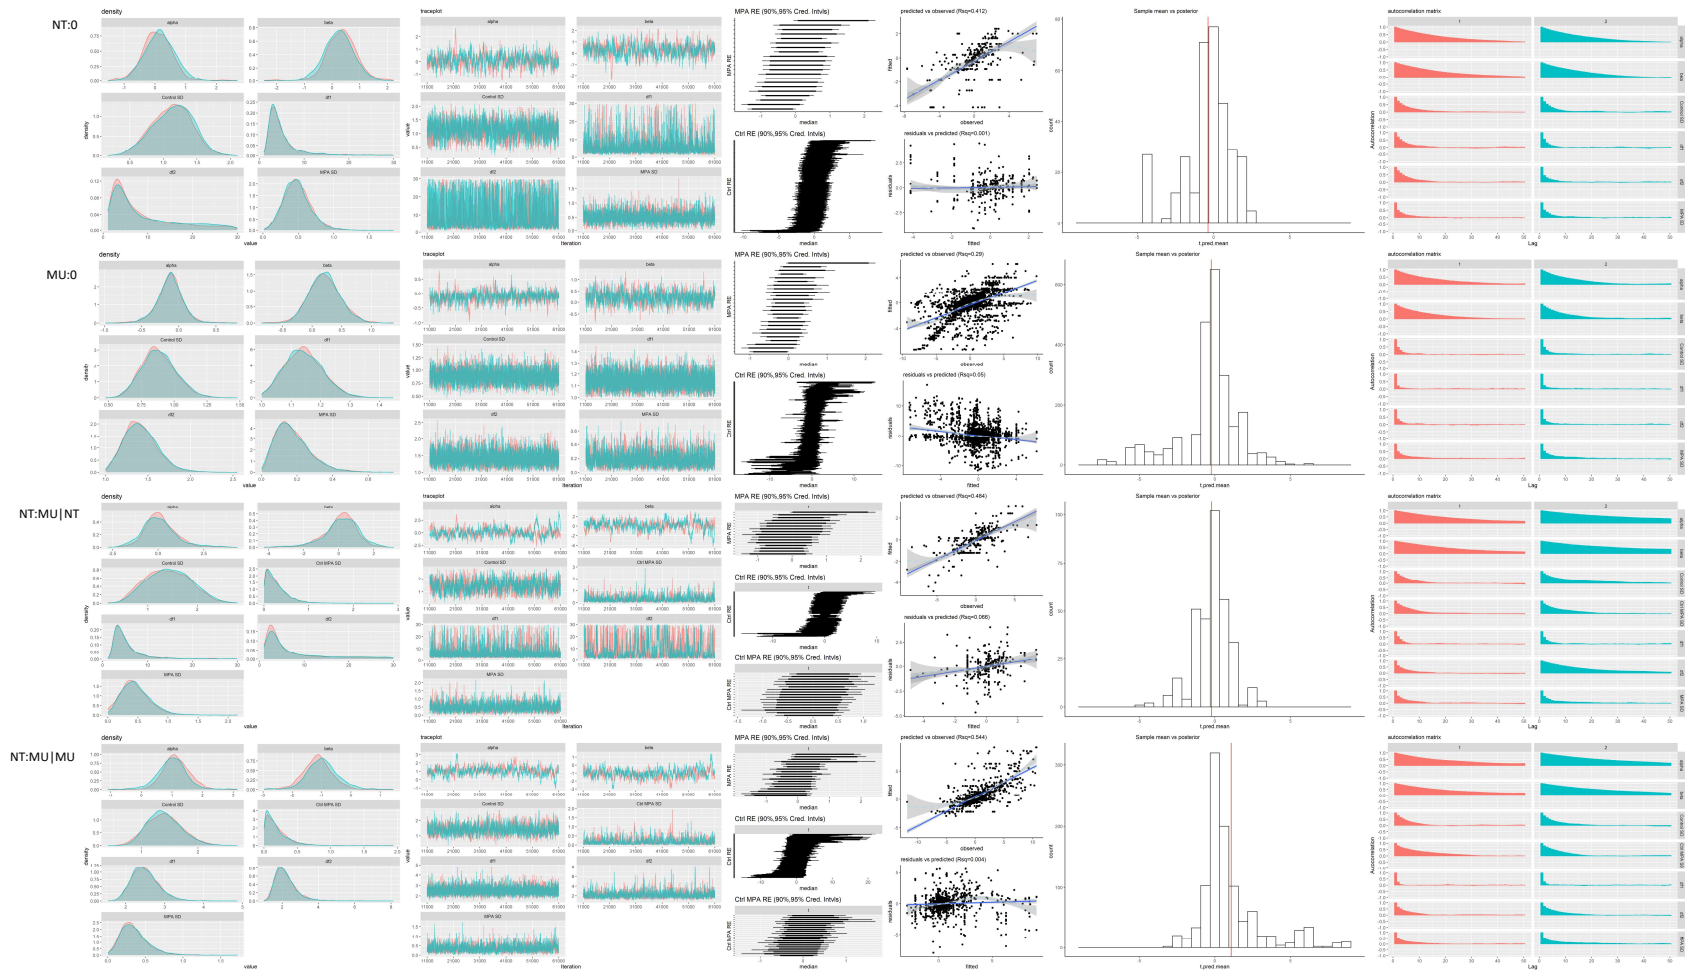

**Fig. S12 | Diagnostic plots for Bayesian linear models of MPA-level impacts on fish biomass (log response ratios) by resource-use regulations.** Plots (from left to right) include density and trace plots for each model parameter; caterpillar plots of MPA, matched control (Ctrl) site, and matched control site MPA random effects (RE); predicted vs. observed and residual vs. predicted scatter plots; sample mean (red vertical line) vs. posterior distribution plots; and auto-correlation plots for each model parameter (rows) and chain (columns). The four rows represent the results for the NT:0, MU:0, NT:MU|NT, and NT:MU|MU models respectively (Table S6).

**Table S1 | Sources and description of MPA management assessment and fish population data.** Adapted from Gill et al (6).

| <b>Dataset/<br/>Management<br/>Assessment Tool</b>                                                                                                   | <b>Geographic<br/>Coverage/Habitat</b>                                                  | <b>Date<br/>Range</b> | <b>Number<br/>of<br/>Assessm<br/>ents/<br/>Survey<br/>Sites</b> | <b>Data Type</b>                                                                         | <b>Data Source</b>                                                                      |
|------------------------------------------------------------------------------------------------------------------------------------------------------|-----------------------------------------------------------------------------------------|-----------------------|-----------------------------------------------------------------|------------------------------------------------------------------------------------------|-----------------------------------------------------------------------------------------|
| <i>Management assessment tool</i>                                                                                                                    |                                                                                         |                       |                                                                 |                                                                                          |                                                                                         |
| Management Effectiveness Tracking Tool (METT)                                                                                                        | Global; mostly developing countries                                                     | 2000-2014             | 533*                                                            | Likert-scaled management assessments                                                     | Global Database for Protected Area Management Effectiveness; Conservation International |
| World Bank MPA Scorecard                                                                                                                             | Global; mostly in developing countries                                                  | 2011-2015             | 166*                                                            | Likert-scaled management assessments                                                     | Conservation International; WWF Birds Head Seascape project                             |
| NOAA Coral Reef Conservation Program (CRCP) MPA Management Assessment Checklist (NOAA CRCP MPA Checklist) & Caribbean MPA Capacity Assessment Tool † | US Caribbean and Pacific as well as other Caribbean MPAs                                | 2011                  | 51*                                                             | Likert-scaled management assessments                                                     | NOAA CRCP; Caribbean MPA Management Capacity Assessment                                 |
| <i>Fish population data</i>                                                                                                                          |                                                                                         |                       |                                                                 |                                                                                          |                                                                                         |
| Atlantic Gulf Rapid Reef Assessment (AGRRA)**                                                                                                        | Wider Caribbean; coral reefs                                                            | 1997-2012             | 1,394                                                           | Underwater Visual Census (UVC) surveys (ecologically and commercially important species) | www.agrra.org                                                                           |
| NOAA National Coral Reef Monitoring Program (NOAA NCRMP)***                                                                                          | US Caribbean and Pacific (Hawaii, Guam, Tutuila); coral reefs and associated ecosystems | 2000-2014             | 8,534                                                           | UVC surveys                                                                              | NOAA NCRMP                                                                              |
| Reef Life Surveys (RLS)                                                                                                                              | Global; rocky and coral reefs                                                           | 2006-2013             | 5,760                                                           | UVC surveys                                                                              | Reef Life Surveys                                                                       |



| <b>Dataset/<br/>Management<br/>Assessment Tool</b>            | <b>Geographic<br/>Coverage/Habitat</b>              | <b>Date<br/>Range</b> | <b>Number<br/>of<br/>Assessm<br/>ents/<br/>Survey<br/>Sites</b> | <b>Data Type</b>                                                    | <b>Data Source</b>            |
|---------------------------------------------------------------|-----------------------------------------------------|-----------------------|-----------------------------------------------------------------|---------------------------------------------------------------------|-------------------------------|
| Wildlife Conservation Society (WCS)                           | East Africa coral reefs (Madagascar and Mozambique) | 2007-2015             | 103*                                                            | UVC surveys (fishable biomass: >10 cm excluding non-target species) | Wildlife Conservation Society |
| WWF Bird's Head Seascape Ecological Impact Evaluation program | Indonesia coral reefs                               | 2011-2014             | 200                                                             | UVC surveys (major fish families)                                   | World Wildlife Fund           |

\*MPA level survey data. \*\*AGRRA data are derived from multiple data providers, including data provided by the Healthy Reef Initiative, Living Oceans Foundation, Bahamas National Trust, Perry Institute for Marine Science, and the Kerzner Foundation. \*\*\*NOAA NCRMP comprised data from the online NCRMP dataset as well as data made available from the NOAA Pacific Islands Fisheries Science Center, Coral Reef Ecosystem Program (CREP). Survey sites refer to spatially explicit sampling events. † The Caribbean MPA Capacity Assessment Tool was commissioned and conducted by the NOAA CRCP, the Gulf and Caribbean Fisheries Institute (GCFI), and the UNEP-CEP Caribbean Marine Protected Area Management Network and Forum.

**Table S2 | Data sources for MPA and zone spatial data.**

| <b>Spatial dataset</b>                                              | <b>Data</b>                                                                                     | <b>Release Date</b> |
|---------------------------------------------------------------------|-------------------------------------------------------------------------------------------------|---------------------|
| World Database of Protected Areas                                   | MPA and zone boundary polygons (or buffered points where no polygon data were available; n=140) | Nov 2017            |
| NOAA MPA Inventory                                                  | MPA boundary polygons                                                                           | 2014                |
| Collaborative Australian Protected Areas Database (CAPAD) Australia | MPA and zone boundary polygons                                                                  | 2016                |
| The Nature Conservancy (TNC) Caribbean MPAs                         | MPA and zone boundary polygons                                                                  | 2014                |
| Healthy Reef Initiative                                             | MPA and zone boundary polygons                                                                  | 2014                |
| MPA Atlas                                                           | MPA and zone boundary polygons                                                                  | 2015                |
| Digitized polygons                                                  | MPA and zone boundary polygons                                                                  | Dependent on source |

**Table S3 | Description and sources of variables used in study.** Adapted from Gill et al (6). Variable types include the response variable (fish biomass), covariates used in the matching procedures, and management and contextual predictors. Data types were continuous (Cont), ordinal (Ord) or binary (Bin). Spatial scale refers to the scale applied in the matching or analysis. See Table S1 for more details on the management and ecological data sources, Table S4 for management indicator scoring levels, and Table S5 for summary statistics.

| Variable                        | Data Type | Spatial Scale | Variable Description                                                                                                                                               | Data Source                                                                                                                                        |
|---------------------------------|-----------|---------------|--------------------------------------------------------------------------------------------------------------------------------------------------------------------|----------------------------------------------------------------------------------------------------------------------------------------------------|
| <i>Response variable</i>        |           |               |                                                                                                                                                                    |                                                                                                                                                    |
| Fish biomass                    | Cont      | Site          | Total fish biomass (g/100m <sup>2</sup> ) of all recorded species >10cm (see Section 2 in methods for exceptions), Calculated from transect/site level data.       | Underwater visual census datasets (Table S1)                                                                                                       |
| <i>Matching covariates</i>      |           |               |                                                                                                                                                                    |                                                                                                                                                    |
| MPA age                         | Cont      | Site          | MPA age at the time of fish survey (years)                                                                                                                         | Calculated from MPA establishment data from official government/NGO sources and/or WDPAs (35) (October 2015 release)                               |
| MPA size                        | Cont      | MPA           | MPA size (km <sup>2</sup> )                                                                                                                                        | Based on data from official government/NGO sources and/or WDPAs (October 2015 release); Some values calculated from spatial data                   |
| Latitude/longitude              | Cont      | Site          | Location of fish survey site                                                                                                                                       | Fish survey data                                                                                                                                   |
| Country                         | Cat       | Site          | Location of fish survey site                                                                                                                                       | Fish survey data; EEZ Maritime Boundaries (78)                                                                                                     |
| Habitat                         | Cat       | Site          | Marine habitat at fish survey site (e.g., coral reefs, rocky reefs, seagrass, mangroves) at the highest resolution available (e.g., fringing vs patch coral reefs) | Fish survey data; benthic NOAA habitat maps (79); WCMC Global Distribution of Coral Reefs (80)                                                     |
| Minimum sea surface temperature | Cont      | Site          | Minimum sea surface temperature (2002-2009; °C)                                                                                                                    | Bio-ORACLE (81)                                                                                                                                    |
| Chlorophyll-a                   | Cont      | Site          | Proxy for primary productivity at study site (Chlorophyll-a (2002-2009; mg/m <sup>3</sup> ))                                                                       | Bio-ORACLE (81)                                                                                                                                    |
| Depth                           | Cont      | Site          | Depth at survey site (m)                                                                                                                                           | Fish survey data; NOAA bathymetric raster maps (82–84)                                                                                             |
| Exposure                        | Cont      | Site          | Wave energy at fish survey site (kW/m)                                                                                                                             | Calculated using wind/wave data from WAVEWATCH III (WW3) (85) and fetch using the 'waver' R package (86)                                           |
| Marine ecoregions               | Cat       | Site          | Marine biogeographic region                                                                                                                                        | WWF Marine Ecosystems of the World GIS layer (87)                                                                                                  |
| Distance to shoreline           | Cont      | Site          | Distance to nearest coastline (km)                                                                                                                                 | Calculated using the high resolution shoreline layer from the Global Self-consistent, Hierarchical, High-resolution Geography (GSHHG) dataset (88) |

| <b>Variable</b>               | <b>Data Type</b> | <b>Spatial Scale</b> | <b>Variable Description</b>                                                                                                                                                                                                   | <b>Data Source</b>                                                                                                  |
|-------------------------------|------------------|----------------------|-------------------------------------------------------------------------------------------------------------------------------------------------------------------------------------------------------------------------------|---------------------------------------------------------------------------------------------------------------------|
| Human population density      | Cont             | Site                 | Coastal population within 100 km radius of fish survey site (# individuals)                                                                                                                                                   | Calculated using the Socioeconomic Data and Application Centre (SEDAC) Gridded Population Of The World dataset (89) |
| Distance to population center | Cont; Bin        | Site                 | Distance to capital or population center, used as a proxy for distance to markets (km) and fishing pressure. Converted to binary to separate sites near (<100 km) vs far (>100 km) from population centers in Bayesian models | Calculated using the World Cities base map layer provided by ESRI (Version 10.1)(90)                                |
| <i>Management variables</i>   |                  |                      |                                                                                                                                                                                                                               |                                                                                                                     |
| Staff capacity                | Ord              | MPA                  | Adequacy of (on-site) staff capacity/numbers to carry out critical management activities (including designated community members)                                                                                             | MPA Management assessment datasets (Table S1)                                                                       |
| Sustainable-use regulations   | Ord              | MPA                  | Appropriate regulations to control use/unsustainable activities are defined and in place                                                                                                                                      | MPA Management assessment datasets (Table S1)                                                                       |

**Table S4 | Indicators, thresholds, scores, and descriptions from the three management assessments used in this study.** Adapted from Gill et al (6). Blue dotted line indicates the threshold levels for each indicator. See Gill et al (6) for more details. Original scores were adjusted to permit alignment between indicator values across assessments.

| Management Indicator                           | Threshold (dashed blue line)                         | Adjusted Score | Indicator Score Descriptions                                  |                                                                                                                                             |                                                                                                                                                                                                                                                             |
|------------------------------------------------|------------------------------------------------------|----------------|---------------------------------------------------------------|---------------------------------------------------------------------------------------------------------------------------------------------|-------------------------------------------------------------------------------------------------------------------------------------------------------------------------------------------------------------------------------------------------------------|
|                                                |                                                      |                | Management Effectiveness Tracking Tool (42)                   | World Bank MPA Scorecard (and variants) (43)                                                                                                | NOAA CRCP MPA Checklist (44) & Caribbean MPA Capacity Assessment Tool (45)                                                                                                                                                                                  |
| Staff capacity and/or presence                 | Adequate staff capacity/presence                     | 1              | There are no staff                                            | There are no staff                                                                                                                          | No management personnel assigned to site and/or little or no formalized community oversight                                                                                                                                                                 |
|                                                |                                                      | 2              | Staff numbers are inadequate or below optimum                 | Staff numbers are inadequate for critical management activities<br>Staff numbers are below optimum level for critical management activities | Some management personnel assigned to site or some formalized community oversight                                                                                                                                                                           |
|                                                |                                                      | 3              | Staff numbers are adequate                                    | Staff numbers are adequate for the management needs of the site                                                                             | Full-time site manager and programmatic personnel assigned to site or local community-based management leader in place that has been formally designated and accepted and is able to dedicate sufficient time to the management of the site                 |
| Appropriateness of regulations controlling use | Appropriate MPA regulations in place controlling use | 1              | There are no regulations or regulations with major weaknesses |                                                                                                                                             | Site has been legally established or is under equivalent customary tenure or other form of community-based protection status, but there are few or no official or community-based rules and regulations in place supporting the MPA and its management plan |
|                                                |                                                      | 2              | Regulations with some weaknesses or gaps                      |                                                                                                                                             | Laws or customary instruments for the establishment of the MPA are in place, and official or community-based rules or regulations governing some specific activities within the MPA are also in place                                                       |
|                                                |                                                      | 3              | Regulations provide an excellent basis for management         |                                                                                                                                             | Clearly defined laws or customary instruments and official or community-based rules and regulations governing all specific activities included in the objectives of the site management plan are in place                                                   |

**Table S5. | Summary statistics for outcome, MPA attribute, contextual, and management variables. SD: standard deviation; SE: standard error.**

| Variable                                       | n (MPAs) | Mean    | SD      | SE     | Median  | Min     | Max      |
|------------------------------------------------|----------|---------|---------|--------|---------|---------|----------|
| <i>Outcome variable</i>                        |          |         |         |        |         |         |          |
| Total fish biomass (log(g/100m <sup>2</sup> )) | 217      | 8.04    | 1.25    | 0.08   | 8.30    | 1.38    | 10.26    |
| <i>MPA attribute and contextual variables</i>  |          |         |         |        |         |         |          |
| Chlorophyll-a (mg/m <sup>3</sup> )             | 217      | 0.83    | 1.47    | 0.10   | 0.36    | 0.04    | 10.71    |
| Depth (m)                                      | 217      | 8.31    | 3.83    | 0.26   | 7.87    | 0.55    | 27.99    |
| Human population (million)                     | 217      | 0.65    | 1.05    | 0.07   | 0.15    | 0.00    | 4.86     |
| Latitude                                       | 217      | 21.81   | 10.86   | 0.74   | 19.66   | 0.18    | 55.90    |
| Longitude                                      | 217      | -10.02  | 116.23  | 7.89   | -71.11  | -178.17 | 177.13   |
| Market distance (km)                           | 217      | 123.72  | 171.70  | 11.66  | 64.82   | 1.05    | 1151.22  |
| Reef area within 15km (km <sup>2</sup> )       | 217      | 35.35   | 41.74   | 2.83   | 28.00   | 0.00    | 266.01   |
| Shore distance (km)                            | 217      | 3.11    | 18.89   | 1.28   | 0.39    | 0.00    | 200.81   |
| Survey year                                    | 217      | 2007.75 | 4.44    | 0.30   | 2009.77 | 1998.00 | 2014.00  |
| Minimum sea surface temp. (°C)                 | 217      | 22.97   | 5.78    | 0.39   | 25.85   | -1.18   | 29.58    |
| Wave exposure (kW/m)*                          | 217      | 185.22  | 2343.35 | 159.08 | 8.05    | 0.00    | 34532.05 |
| MPA age (yrs)                                  | 217      | 18.57   | 14.34   | 0.98   | 14.56   | 3.00    | 95.00    |
| MPA area (km <sup>2</sup> )                    | 217      | 6.20    | 49.68   | 3.37   | 0.04    | 0.00    | 687.99   |
| <i>Management variables</i>                    |          |         |         |        |         |         |          |
| Adequate staff capacity                        | 217      | 0.19    | 0.40    | 0.05   | 0.00    | 0.00    | 1.00     |
| Sustainable use regulations                    | 217      | 0.76    | 0.43    | 0.06   | 1.00    | 0.00    | 1.00     |

\* Extreme outliers present, likely due to an error from wind time series from the Mediterranean (not used in the analysis); median wave exposure value is more representative. Statistics for the MPA attribute and contextual variables represent the mean values from all survey sites inside the MPA.

**Table S6 | Comparisons examined in the study, with descriptions of the estimands and treatment and counterfactual groups used to estimate the absolute and relative impacts of no-take and multiple-use MPAs (Adapted from Rasolofoson et al (49)).**

| Comparison       |                                                                | Abbreviation | Estimand                                                                                                                                                             | Treatment        | Counterfactual   |
|------------------|----------------------------------------------------------------|--------------|----------------------------------------------------------------------------------------------------------------------------------------------------------------------|------------------|------------------|
| Absolute impacts | No-take MPA to no MPA in no-take MPA locations                 | NT:0         | expected difference between biomass in protected no-take MPA/zones compared to the same sites if they were not protected<br>$E(Y_{NT} - Y_0   T_{NT} = 1)$           | No-take MPA      | No MPA           |
|                  | Multiple-use MPA to no MPA in multiple-use MPA locations       | MU:0         | expected difference between biomass in multiple-use MPA/zones compared to the same sites if they were not protected<br>$E(Y_{NT} - Y_0   T_{MU} = 1)$                | Multiple-use MPA | No MPA           |
| Relative impacts | No-take MPA to multiple-use MPA in no-take MPA locations       | NT:MU NT     | expected difference between biomass in no-take MPA/zones compared to the same sites if they were multiple-use MPA sites instead<br>$E(Y_{NT} - Y_{MU}   T_{NT} = 1)$ | No-take MPA      | Multiple-use MPA |
|                  | No-take MPA to multiple-use MPA in multiple-use MPA locations* | NT:MU MU     | expected difference between biomass in multiple-use MPA/zones compared to the same sites if they were no-take MPA sites instead<br>$E(Y_{NT} - Y_{MU}   T_{MU} = 1)$ | Multiple-use MPA | No-take MPA      |

\*Model estimates generated as MU-NT but converted to NT-MU by multiplying by -1 for easier interpretation

**Table S7 | Covariates used in the matching process to identify appropriate control fish survey sites to pair with treated sites based on their influence on site selection and fish biomass outcomes.** Calipers were used for covariates known to strongly affect fish biomass outcomes. Adapted from Gill et al (6). See Table S8 for post-matching statistics.

| Matching Covariates                                         | Rationale                                                                                                                                                                                                                                          | Restrictions in Treatment-Control Matched Pairs (calipers)            |
|-------------------------------------------------------------|----------------------------------------------------------------------------------------------------------------------------------------------------------------------------------------------------------------------------------------------------|-----------------------------------------------------------------------|
| <i>Exact matching variables</i>                             |                                                                                                                                                                                                                                                    |                                                                       |
| Sampling protocol                                           | Control for differences in sampling methodologies (24).                                                                                                                                                                                            | Same methodology only                                                 |
| Habitat type                                                | Control for habitat selection bias in MPA placement (91) and natural variation in fish communities by habitat (8, 19, 24, 33, 92–94).                                                                                                              | Similar habitat type only                                             |
| Country                                                     | Control for variation in national policies and/or resource use patterns between countries (95).                                                                                                                                                    | Same country only                                                     |
| Marine ecoregions                                           | Control for large-scale biogeographic variation (87).                                                                                                                                                                                              | Same ecoregion only                                                   |
| <i>Nearest neighbor matching variables</i>                  |                                                                                                                                                                                                                                                    |                                                                       |
| Minimum sea surface temperature (2002-2009; °C)             | Temperature affects fish community structure. Low temperatures can act as spatial boundaries for warm water fish species (96), which make up the majority of the sample.                                                                           | Minimize mean difference                                              |
| Chlorophyll-a (2002-2009; mg/m <sup>3</sup> )               | Control for variations in available primary productivity which could affect community composition (73, 97).                                                                                                                                        | Minimize mean difference                                              |
| Depth (m)                                                   | Control for natural variation in community composition by depth (98).                                                                                                                                                                              | Minimize mean difference                                              |
| Wave exposure (kW/m)                                        | Wave energy explains some of the variation in marine community composition (19, 99, 100). Adverse sea conditions can also be a deterrent for small fishing vessels resulting in lower fishing pressure (101, 102).                                 | Minimize mean difference                                              |
| Distance to shoreline (km)                                  | All else equal, fishing intensity is usually negatively correlated with shore distance (103, 104). Also accounts for other land-based human stressors (e.g., pollution, destructive nearshore activities) from neighboring coastal populations.    | Minimize mean difference (maximum difference of 1 standard deviation) |
| Coastal population (individuals within 100km <sup>2</sup> ) | Control for human impacts (e.g. pollution, destructive nearshore activities) from neighboring coastal populations (55, 105).                                                                                                                       | Minimize mean difference (maximum difference of 1 standard deviation) |
| Distance to provincial capital (market) (km)                | Distance to capital used as a proxy for distance to major markets, which is commonly negatively correlated with fishing intensity (55, 56, 106).                                                                                                   | Minimize mean difference (maximum difference of 1 standard deviation) |
| Reef area within 15 km (km <sup>2</sup> )                   | Neighboring reefs that can act as sources for larvae and other forms of connectivity amongst meta-populations (107).                                                                                                                               | Minimize mean difference                                              |
| Sample date (years)                                         | Control for unobserved temporal variation caused by factors such as exogenous shocks (e.g., storm events, algal blooms) and other changes between survey periods (32).                                                                             | Minimize mean difference (maximum difference of 4 years)              |
| Latitude/ longitude                                         | Control for unobserved spatial variation caused by time-invariant factors (e.g., differences in local social-ecological conditions) or localized shocks (e.g., storm history) that may vary between sites. Also reduces latitudinal effects (i.e., | Minimize mean difference (maximum difference of 2.5° latitude)        |



| Matching Covariates | Rationale                                                                                                                                                                                                        | Restrictions in Treatment-Control Matched Pairs (calipers)            |
|---------------------|------------------------------------------------------------------------------------------------------------------------------------------------------------------------------------------------------------------|-----------------------------------------------------------------------|
| MPA age*            | <p>varying environmental conditions with increasing distance from equator).</p> <p>Control for the effects of MPA age on fish biomass (e.g., older MPAs allow for greater population recovery) (4, 23, 108).</p> | Minimize mean difference (maximum difference of 1 standard deviation) |
| MPA area*           | Control for the effects of MPA size on biomass (e.g., larger MPAs protect a greater portion of fish species ranges) (4, 108).                                                                                    | Minimize mean difference                                              |

\* Covariates used for estimating relative impacts (i.e., directly matching NT and MU MPA sites: NT:MU|NT; NT:MU|MU; Table S6).

**Table S8 | Covariate balance statistics for the unmatched (before) and matched (after) fish survey site data.** Table shows treatment and control means, standardized mean differences, raw mean (Mean eQQ diff.) and maximum (max eQQ diff.) differences from empirical quantile-quantile plots between the groups for each comparison (Table S6) and each covariate (Tables S3 and S7).

| Comparison                                    | Treatment Mean |        | Control Mean |        | Standardized Mean Difference |       | Raw eQQ diff (Mean) |       | Raw eQQ diff (Max) |        |
|-----------------------------------------------|----------------|--------|--------------|--------|------------------------------|-------|---------------------|-------|--------------------|--------|
|                                               | Before         | After  | Before       | After  | Before                       | After | Before              | After | Before             | After  |
| <b>Wave exposure (kW/m)</b>                   |                |        |              |        |                              |       |                     |       |                    |        |
| NT:0                                          | 26.16          | 20.17  | 19.49        | 16.26  | 15.97                        | 13.58 | 8.83                | 5.23  | 341                | 166    |
| MU:0                                          | 34.22          | 31.23  | 19.49        | 21.68  | 2.33                         | 1.33  | 14.71               | 24.9  | 33874              | 33874  |
| NT:MU NT                                      | 26.16          | 24.36  | 34.22        | 14.18  | -19.29                       | 28.53 | 17.96               | 10.66 | 34215              | 41     |
| NT:MU MU                                      | 34.22          | 24.03  | 26.16        | 21.52  | 1.27                         | 4.06  | 17.96               | 9.01  | 34215              | 384    |
| <b>Survey year*</b>                           |                |        |              |        |                              |       |                     |       |                    |        |
| NT:0                                          | 2008           | 2007   | 2007         | 2007   | 8.68                         | 2.41  | 0.39                | 0.47  | 3                  | 3      |
| MU:0                                          | 2007           | 2007   | 2007         | 2007   | -2.84                        | 2.81  | 0.49                | 0.15  | 2                  | 1      |
| NT:MU NT                                      | 2008           | 2007   | 2007         | 2007   | 11.41                        | -0.67 | 0.45                | 0.15  | 2                  | 1      |
| NT:MU MU                                      | 2007           | 2008   | 2008         | 2008   | -11.76                       | -3.6  | 0.45                | 0.13  | 2                  | 1      |
| <b>Shore distance (km)*</b>                   |                |        |              |        |                              |       |                     |       |                    |        |
| NT:0                                          | 2.96           | 0.65   | 4.35         | 0.58   | -6.48                        | 8.1   | 1.45                | 0.18  | 106.60             | 3.54   |
| MU:0                                          | 14.64          | 1      | 4.35         | 0.94   | 21.33                        | 3.9   | 11.66               | 0.15  | 184.24             | 8.91   |
| NT:MU NT                                      | 2.97           | 1.04   | 14.64        | 1.01   | -54.68                       | 0.49  | 12.26               | 0.42  | 188.06             | 21.51  |
| NT:MU MU                                      | 14.64          | 1.09   | 2.97         | 0.92   | 24.19                        | 4.34  | 12.26               | 0.27  | 188.06             | 20.98  |
| <b>Reef area within 15km (km<sup>2</sup>)</b> |                |        |              |        |                              |       |                     |       |                    |        |
| NT:0                                          | 29.79          | 27.88  | 33.38        | 29.43  | -9.56                        | -5.52 | 6.48                | 3.2   | 62.25              | 55.50  |
| MU:0                                          | 39.72          | 42.96  | 33.38        | 41.02  | 21.25                        | 6.85  | 10.92               | 3.05  | 93.75              | 43.50  |
| NT:MU NT                                      | 29.78          | 31.99  | 39.72        | 35.24  | -26.43                       | -9.14 | 14.42               | 9.17  | 116.00             | 105.50 |
| NT:MU MU                                      | 39.72          | 38.41  | 29.78        | 33.26  | 33.31                        | 15.75 | 14.42               | 7.63  | 116.00             | 76.25  |
| <b>MPA area (km<sup>2</sup>)</b>              |                |        |              |        |                              |       |                     |       |                    |        |
| NT:MU NT                                      | 22.72          | 24.19  | 10.14        | 24.24  | 11.45                        | -0.04 | 12.71               | 0.06  | 626.80             | 1.25   |
| NT:MU MU                                      | 10.14          | 15.75  | 22.72        | 15.78  | -17.49                       | -0.03 | 12.71               | 0.06  | 626.80             | 26.11  |
| <b>MPA age (yrs)*</b>                         |                |        |              |        |                              |       |                     |       |                    |        |
| NT:MU NT                                      | 26.62          | 27.43  | 22.05        | 28.43  | 26.1                         | -5.61 | 6.35                | 2.35  | 42.00              | 9.00   |
| NT:MU MU                                      | 22.05          | 21.55  | 26.62        | 21.77  | -25.76                       | -0.98 | 6.35                | 1.92  | 42.00              | 10.00  |
| <b>Minimum sea surface temp. (°C)</b>         |                |        |              |        |                              |       |                     |       |                    |        |
| NT:0                                          | 22.39          | 22.53  | 22.38        | 22.51  | 0.27                         | 0.35  | 0.81                | 0.21  | 10.52              | 2.14   |
| MU:0                                          | 24             | 24.48  | 22.38        | 24.43  | 39.79                        | 1.4   | 1.74                | 0.15  | 8.01               | 1.07   |
| NT:MU NT                                      | 22.4           | 22.94  | 24           | 22.98  | -30.43                       | -0.85 | 1.7                 | 0.22  | 7.28               | 2.29   |
| NT:MU MU                                      | 24             | 23.17  | 22.4         | 23.18  | 39.43                        | -0.39 | 1.7                 | 0.09  | 7.28               | 0.85   |
| <b>Market distance (km)*</b>                  |                |        |              |        |                              |       |                     |       |                    |        |
| NT:0                                          | 162.18         | 97.7   | 106.74       | 97.6   | 27.79                        | 0.11  | 64.12               | 14.32 | 967.21             | 132.64 |
| MU:0                                          | 99.21          | 63.4   | 106.74       | 65.68  | -4.85                        | -2.55 | 18.78               | 8.18  | 947.05             | 130.92 |
| NT:MU NT                                      | 162.2          | 149.07 | 99.21        | 129.62 | 31.58                        | 10.57 | 63.17               | 22.04 | 405.44             | 88.55  |
| NT:MU MU                                      | 99.21          | 114.06 | 162.2        | 127.97 | -40.56                       | -7.41 | 63.17               | 15.79 | 405.44             | 101.92 |
| <b>Longitude</b>                              |                |        |              |        |                              |       |                     |       |                    |        |
| NT:0                                          | 7.46           | -1.9   | -20.52       | -1.95  | 24                           | 0.04  | 28.48               | 0.18  | 190.77             | 3.28   |
| MU:0                                          | -25.38         | -28.12 | -20.52       | -28.07 | -4.92                        | -0.05 | 31.26               | 0.19  | 198.60             | 1.68   |
| NT:MU NT                                      | 7.43           | 1.84   | -25.38       | 1.84   | 28.14                        | 0     | 35.28               | 0.15  | 211.86             | 1.37   |
| NT:MU MU                                      | -25.38         | 4.86   | 7.43         | 4.88   | -33.24                       | -0.02 | 35.28               | 0.08  | 211.86             | 1.57   |
| <b>Latitude*</b>                              |                |        |              |        |                              |       |                     |       |                    |        |
| NT:0                                          | -3.14          | -0.6   | 0.84         | -0.53  | -16.27                       | -0.26 | 4.65                | 0.26  | 30.97              | 2.28   |
| MU:0                                          | 7.4            | 7.25   | 0.84         | 7.34   | 30.47                        | -0.41 | 7.41                | 0.19  | 36.22              | 1.57   |

| Comparison                              | Treatment |       | Control |       | Standardized    |       | Raw eQQ diff |       | Raw eQQ diff |       |
|-----------------------------------------|-----------|-------|---------|-------|-----------------|-------|--------------|-------|--------------|-------|
|                                         | Mean      |       | Mean    |       | Mean Difference |       | (Mean)       |       | (Max)        |       |
|                                         | Before    | After | Before  | After | Before          | After | Before       | After | Before       | After |
| NT:MU NT                                | -3.15     | -0.72 | 7.4     | -0.54 | -43.04          | -0.75 | 10.54        | 0.34  | 47.86        | 1.73  |
| NT:MU MU                                | 7.4       | -0.36 | -3.15   | -0.49 | 49.05           | 0.57  | 10.54        | 0.22  | 47.86        | 1.51  |
| <b>Human population (million)*</b>      |           |       |         |       |                 |       |              |       |              |       |
| NT:0                                    | 0.35      | 0.38  | 0.65    | 0.36  | -37.91          | 2.12  | 0.3          | 0.03  | 2.35         | 0.51  |
| MU:0                                    | 0.72      | 0.76  | 0.65    | 0.84  | 8.94            | -10.3 | 0.32         | 0.12  | 2.02         | 0.89  |
| NT:MU NT                                | 0.35      | 0.22  | 0.72    | 0.21  | -47.6           | 0.76  | 0.48         | 0.02  | 1.49         | 0.30  |
| NT:MU MU                                | 0.72      | 0.29  | 0.35    | 0.29  | 44.02           | 0.99  | 0.48         | 0.01  | 1.49         | 0.30  |
| <b>Depth (m)</b>                        |           |       |         |       |                 |       |              |       |              |       |
| NT:0                                    | 8.22      | 8.15  | 9.02    | 8.46  | -16.1           | -6.18 | 0.95         | 0.4   | 45.88        | 10.30 |
| MU:0                                    | 11.07     | 10.76 | 9.02    | 10.84 | 25.21           | -1.08 | 2.14         | 0.68  | 30.54        | 9.46  |
| NT:MU NT                                | 8.22      | 8.21  | 11.07   | 8.26  | -57.27          | -0.96 | 3.03         | 0.27  | 15.35        | 11.20 |
| NT:MU MU                                | 11.07     | 10.24 | 8.22    | 8.21  | 35.04           | 30.4  | 3.03         | 2.06  | 15.35        | 15.35 |
| <b>Chlorophyll-a (mg/m<sup>3</sup>)</b> |           |       |         |       |                 |       |              |       |              |       |
| NT:0                                    | 0.81      | 0.85  | 0.78    | 0.67  | 1.59            | 11.75 | 0.16         | 0.22  | 3.72         | 4.60  |
| MU:0                                    | 0.61      | 0.6   | 0.78    | 0.5   | -21.18          | 11.24 | 0.27         | 0.14  | 6.87         | 4.99  |
| NT:MU NT                                | 0.81      | 0.78  | 0.61    | 0.71  | 13.66           | 4.36  | 0.25         | 0.08  | 5.11         | 5.03  |
| NT:MU MU                                | 0.61      | 0.56  | 0.81    | 0.56  | -24             | 0.7   | 0.25         | 0.05  | 5.11         | 2.84  |
| <b>Exposure dummy variable**</b>        |           |       |         |       |                 |       |              |       |              |       |
| NT:0                                    | 0.02      | 0.02  | 0.01    | 0.02  | 4.27            | 0.11  | 0.01         | 0     | 1            | 1     |
| MU:0                                    | 0.01      | 0.01  | 0.01    | 0.01  | -4.91           | 2.66  | 0            | 0     | 1            | 1     |
| NT:MU NT                                | 0.02      | 0.02  | 0.01    | 0.02  | 7.48            | 1.91  | 0.01         | 0     | 1            | 1     |
| NT:MU MU                                | 0.01      | 0.01  | 0.02    | 0.01  | -11.45          | 2.21  | 0.01         | 0     | 1            | 1     |
| <b>Depth dummy variable**</b>           |           |       |         |       |                 |       |              |       |              |       |
| NT:0                                    | 0         | 0     | 0.01    | 0     | -5.53           | 0     | 0            | 0     | 1            | 0     |
| MU:0                                    | 0         | 0     | 0.01    | 0     | -3.48           | 0     | 0            | 0     | 1            | 0     |
| NT:MU NT                                | 0         | 0     | 0       | 0     | -1.59           | -1.03 | 0            | 0     | 1            | 1     |
| NT:MU MU                                | 0         | 0     | 0       | 0     | 1.41            | 0.68  | 0            | 0     | 1            | 1     |

\*Calipers used in matching procedure (see Table S7). \*\*Dummy variable used to indicate where mean values were used to fill missing data (<1% of data). Lower post-matching differences indicate good matching performance for that covariate (25). See Table S3 and S7 for covariate descriptions and caliper restrictions.

**Table S9 | Summary of posterior statistics for Bayesian models estimating MPA impacts.** Intercept (alpha) represents the MPA treatment effect of interest; beta is the binary fixed effect term for the population center distance (alpha:far >100km, alpha+beta:near <100km), capacity (alpha:inadequate; alpha+beta:adequate), and regulations (alpha:weak; alpha+beta:strong) models. Mean, SD (standard deviation) and distribution percentiles are also shown. Percent biomass differences were calculated using the log biomass ratios and Equation 3. NT:MU|MU model estimates generated as MU-NT but converted to NT-MU by multiplying by -1 for easier interpretation. P(positive): probability of a positive effect. See Table S6 for comparison descriptions.

| Predictor                   | Variable   | Comparison | Log Biomass Ratio |       |       |       |       |      |        | % Biomass Difference |        |        |        |        | P(positive) |
|-----------------------------|------------|------------|-------------------|-------|-------|-------|-------|------|--------|----------------------|--------|--------|--------|--------|-------------|
|                             |            |            | Mean              | SD    | 2.5%  | 10%   | 50%   | 90%  | 97.5%  | 2.5%                 | 10%    | 50%    | 90%    | 97.5%  |             |
| No predictor                | alpha      | MU:0       | 0.12              | 0.07  | -0.01 | 0.04  | 0.12  | 0.20 | 0.25   | -0.76                | 3.85   | 12.58  | 22.46  | 28.67  | 0.97        |
|                             |            | NT:0       | 0.46              | 0.10  | 0.26  | 0.33  | 0.46  | 0.59 | 0.66   | 29.40                | 39.17  | 58.21  | 80.80  | 93.91  | 1.00        |
|                             |            | NT:MU MU   | 0.08              | 0.08  | -0.07 | -0.02 | 0.08  | 0.18 | 0.23   | -7.12                | -2.13  | 8.25   | 19.65  | 26.40  | 0.84        |
|                             |            | NT:MU NT   | 0.17              | 0.08  | 0.01  | 0.06  | 0.17  | 0.28 | 0.33   | 1.11                 | 6.66   | 18.36  | 31.79  | 39.58  | 0.98        |
| Near population center      | alpha      | MU:0       | 0.37              | 0.11  | 0.16  | 0.22  | 0.36  | 0.51 | 0.59   | 17.61                | 25.06  | 43.95  | 65.86  | 80.27  | 1.00        |
|                             |            | alpha+beta | 0.04              | 0.07  | -0.10 | -0.05 | 0.04  | 0.13 | 0.18   | -9.65                | -5.07  | 3.97   | 14.03  | 19.89  | 0.71        |
|                             | alpha+beta | NT:0       | 0.56              | 0.15  | 0.27  | 0.37  | 0.56  | 0.75 | 0.86   | 30.81                | 45.38  | 75.38  | 111.28 | 135.31 | 1.00        |
|                             |            | NT:MU MU   | 0.41              | 0.12  | 0.18  | 0.25  | 0.41  | 0.56 | 0.64   | 19.54                | 29.03  | 50.22  | 74.66  | 89.04  | 1.00        |
|                             | alpha+beta | NT:MU NT   | 0.01              | 0.11  | -0.19 | -0.12 | 0.02  | 0.15 | 0.22   | -17.67               | -11.51 | 1.79   | 16.00  | 24.35  | 0.56        |
|                             |            | NT:MU NT   | 0.15              | 0.10  | -0.05 | 0.02  | 0.15  | 0.28 | 0.36   | -4.93                | 1.59   | 15.66  | 32.51  | 42.91  | 0.92        |
|                             |            | NT:MU NT   | 0.09              | 0.09  | -0.09 | -0.03 | 0.09  | 0.21 | 0.27   | -9.05                | -3.11  | 9.16   | 23.26  | 31.61  | 0.83        |
| Adequate staff capacity     | alpha      | MU:0       | -0.06             | 0.12  | -0.29 | -0.20 | -0.06 | 0.09 | 0.18   | -24.93               | -18.46 | -5.71  | 9.17   | 19.56  | 0.29        |
|                             |            | alpha+beta | 0.66              | 0.47  | -0.30 | -0.02 | 0.71  | 1.23 | 1.48   | -26.27               | -1.84  | 103.79 | 243.82 | 340.84 | 0.89        |
|                             | alpha+beta | NT:0       | 0.25              | 0.23  | -0.21 | -0.05 | 0.25  | 0.55 | 0.72   | -18.89               | -4.82  | 27.94  | 72.77  | 104.86 | 0.86        |
|                             |            | NT:MU MU   | 0.58              | 0.42  | -0.20 | 0.05  | 0.57  | 1.13 | 1.45   | -18.33               | 5.14   | 77.54  | 209.17 | 325.54 | 0.92        |
|                             | alpha+beta | NT:MU MU   | 0.78              | 0.32  | 0.15  | 0.38  | 0.79  | 1.17 | 1.40   | 16.20                | 46.71  | 120.81 | 222.22 | 303.66 | 0.99        |
|                             |            | NT:MU NT   | -0.32             | 0.31  | -0.95 | -0.72 | -0.32 | 0.07 | 0.30   | -61.24               | -51.14 | -27.44 | 6.93   | 34.41  | 0.14        |
|                             |            | NT:MU NT   | 0.01              | 0.35  | -0.68 | -0.44 | 0.01  | 0.45 | 0.71   | -49.24               | -35.45 | 1.08   | 56.74  | 103.96 | 0.51        |
| Sustainable use regulations | alpha      | MU:0       | -0.12             | 0.17  | -0.49 | -0.33 | -0.11 | 0.09 | 0.22   | -38.59               | -28.17 | -10.73 | 8.91   | 25.01  | 0.22        |
|                             |            | alpha+beta | 0.09              | 0.19  | -0.25 | -0.14 | 0.09  | 0.34 | 0.48   | -22.23               | -13.31 | 8.94   | 40.71  | 61.79  | 0.68        |
|                             | alpha+beta | NT:0       | 0.12              | 0.50  | -0.84 | -0.50 | 0.11  | 0.73 | 1.09   | -56.72               | -39.17 | 11.79  | 107.54 | 196.49 | 0.59        |
|                             |            | NT:MU MU   | 0.41              | 0.24  | -0.03 | 0.12  | 0.41  | 0.72 | 0.90   | -2.74                | 12.97  | 50.62  | 104.96 | 146.38 | 0.97        |
|                             | alpha+beta | NT:MU MU   | 1.07              | 0.47  | 0.14  | 0.51  | 1.06  | 1.64 | 2.01   | 14.81                | 66.03  | 189.73 | 416.66 | 646.12 | 0.98        |
|                             |            | NT:MU NT   | 0.01              | 0.28  | -0.52 | -0.33 | 0.00  | 0.36 | 0.61   | -40.59               | -27.91 | 0.00   | 43.45  | 83.39  | 0.50        |
|                             |            | NT:MU NT   | 0.09              | 0.90  | -1.53 | -0.91 | 0.01  | 1.21 | 2.19   | -78.43               | -59.83 | 1.12   | 235.29 | 795.95 | 0.51        |
| alpha+beta                  | NT:MU NT   | 0.22       | 0.32              | -0.43 | -0.17 | 0.23  | 0.62  | 0.86 | -35.17 | -15.41               | 25.39  | 85.96  | 135.99 | 0.77   |             |

**Table S10 | Diagnostic statistics for parameters in the Bayesian models without fixed effect predictors.** Intercept (alpha) represents the MPA treatment effect of interest. SD: standard deviation; df: degrees of freedom. See Table S6 for comparison descriptions.

| Predictor    | Variable    | Comparison | Log Biomass Ratio |      | # Sites | # MPAs | Rhat | Effective Sample Size | Total Iterations | Raftery & Lewis<br>Min # Iterations | Geweke Z Scores |         |
|--------------|-------------|------------|-------------------|------|---------|--------|------|-----------------------|------------------|-------------------------------------|-----------------|---------|
|              |             |            | Mean              | SD   |         |        |      |                       |                  |                                     | Chain 1         | Chain 2 |
| No predictor | alpha       | MU:0       | 0.12              | 0.07 | 4626    | 114    | 1    | 1656                  | 4000             | 3746                                | -0.79           | 0.29    |
|              | Control SD  |            | 0.74              | 0.08 | 4626    | 114    | 1    | 2923                  | 4000             | 3746                                | 0.36            | -0.36   |
|              | df1         |            | 2.03              | 0.12 | 4626    | 114    | 1    | 6544                  | 4000             | 3746                                | -1.04           | -0.47   |
|              | df2         |            | 1.76              | 0.19 | 4626    | 114    | 1    | 3623                  | 4000             | 3746                                | 0.61            | 0.59    |
|              | MPA SD      |            | 0.23              | 0.05 | 4626    | 114    | 1    | 3520                  | 4000             | 3746                                | 0.42            | -1.31   |
|              | alpha       | NT:0       | 0.46              | 0.1  | 3101    | 89     | 1    | 1294                  | 4000             | 3746                                | -0.33           | 1.35    |
|              | Control SD  |            | 0.99              | 0.1  | 3101    | 89     | 1.01 | 2869                  | 4000             | 3746                                | -2.18           | 0.94    |
|              | df1         |            | 2.48              | 0.16 | 3101    | 89     | 1    | 7105                  | 4000             | 3746                                | 1.03            | -1.81   |
|              | df2         |            | 2.39              | 0.36 | 3101    | 89     | 1    | 3633                  | 4000             | 3746                                | -2.71           | 1.04    |
|              | MPA SD      |            | 0.41              | 0.08 | 3101    | 89     | 1    | 3726                  | 4000             | 3746                                | 0.14            | 1.42    |
|              | alpha       | NT:MU MU   | 0.08              | 0.08 | 3261    | 79     | 1    | 1856                  | 4000             | 3746                                | 1.02            | 0.27    |
|              | Control SD  |            | 0.78              | 0.08 | 3261    | 79     | 1    | 2120                  | 4000             | 3746                                | -0.74           | -0.93   |
|              | Ctrl MPA SD |            | 0.08              | 0.06 | 3261    | 79     | 1    | 466                   | 4000             | 3746                                | 0.58            | -2.11   |
|              | df1         |            | 2.91              | 0.22 | 3261    | 79     | 1    | 7255                  | 4000             | 3746                                | -0.07           | -0.69   |
|              | df2         |            | 1.93              | 0.23 | 3261    | 79     | 1    | 2791                  | 4000             | 3746                                | -0.7            | -0.65   |
|              | MPA SD      |            | 0.25              | 0.05 | 3261    | 79     | 1    | 4363                  | 4000             | 3746                                | 0.07            | 1.19    |
|              | alpha       | NT:MU NT   | 0.17              | 0.08 | 3419    | 78     | 1    | 1685                  | 4000             | 3746                                | -0.72           | -1.06   |
|              | Control SD  |            | 0.92              | 0.09 | 3419    | 78     | 1    | 2466                  | 4000             | 3746                                | -0.02           | 0.62    |
|              | Ctrl MPA SD |            | 0.06              | 0.05 | 3419    | 78     | 1    | 332                   | 4000             | 3746                                | -0.39           | -2.25   |
|              | df1         |            | 2.58              | 0.16 | 3419    | 78     | 1    | 8616                  | 4000             | 3746                                | -0.13           | -2.22   |
|              | df2         |            | 2.25              | 0.31 | 3419    | 78     | 1    | 3021                  | 4000             | 3746                                | -0.54           | 1.14    |
|              | MPA SD      |            | 0.28              | 0.07 | 3419    | 78     | 1    | 3014                  | 4000             | 3746                                | -0.93           | 0.07    |

**Table S11 | Diagnostic statistics for parameters in the Bayesian models with a binary predictor (beta) to identify sites in MPAs near (alpha.beta) or far from (alpha) population centers.** Intercept (alpha) represents the MPA treatment effect of interest. SD: standard deviation; df: degrees of freedom. alpha.beta parameters are the sum of the intercept (alpha) and predictor (beta) coefficients. See Table S6 for comparison descriptions.

| Predictor              | Variable    | Comparison | Log Biomass Ratio |      |         |        | Rhat | Effective Sample Size | Total Iterations | Raftery & Lewis  |         | Geweke Z Scores |  |
|------------------------|-------------|------------|-------------------|------|---------|--------|------|-----------------------|------------------|------------------|---------|-----------------|--|
|                        |             |            | Mean              | SD   | # Sites | # MPAs |      |                       |                  | Min # Iterations | Chain 1 | Chain 2         |  |
| Near population center | alpha       | MU:0       | 0.37              | 0.11 | 742     | 41     | 1    | 580                   | 4000             | 3746             | -0.04   | -1.44           |  |
|                        | alpha.beta  |            | 0.04              | 0.07 | 3884    | 76     |      |                       |                  |                  |         |                 |  |
|                        | beta        |            | -0.33             | 0.12 | 3884    | 76     | 1    | 590                   | 4000             | 3746             | 0.16    | 1.35            |  |
|                        | Control SD  |            | 0.74              | 0.08 | 4626    | 117    | 1    | 2787                  | 4000             | 3746             | -0.85   | -0.19           |  |
|                        | df1         |            | 2.03              | 0.12 | 4626    | 117    | 1    | 6170                  | 4000             | 3746             | 2.67    | -2.69           |  |
|                        | df2         |            | 1.76              | 0.19 | 4626    | 117    | 1    | 3512                  | 4000             | 3746             | -0.49   | -0.03           |  |
|                        | MPA SD      |            | 0.22              | 0.05 | 4626    | 117    | 1    | 3522                  | 4000             | 3746             | -0.87   | -0.15           |  |
|                        | alpha       | NT:0       | 0.56              | 0.15 | 846     | 35     | 1.01 | 634                   | 4000             | 3746             | -1.1    | 0.09            |  |
|                        | alpha.beta  |            | 0.41              | 0.12 | 2255    | 56     |      |                       |                  |                  |         |                 |  |
|                        | beta        |            | -0.15             | 0.17 | 2255    | 56     | 1    | 694                   | 4000             | 3746             | -0.39   | -0.12           |  |
|                        | Control SD  |            | 0.99              | 0.1  | 3101    | 91     | 1    | 2987                  | 4000             | 3746             | -1.91   | -2.5            |  |
|                        | df1         |            | 2.48              | 0.16 | 3101    | 91     | 1    | 7020                  | 4000             | 3746             | -0.62   | -0.81           |  |
|                        | df2         |            | 2.37              | 0.35 | 3101    | 91     | 1    | 3687                  | 4000             | 3746             | -1.76   | -0.73           |  |
|                        | MPA SD      |            | 0.4               | 0.08 | 3101    | 91     | 1    | 3600                  | 4000             | 3746             | -1.12   | 3.3             |  |
|                        | alpha       | NT:MU MU   | 0.01              | 0.11 | 971     | 33     | 1.01 | 1008                  | 4000             | 3746             | -0.54   | -0.27           |  |
|                        | alpha.beta  |            | 0.15              | 0.1  | 2290    | 49     |      |                       |                  |                  |         |                 |  |
|                        | beta        |            | 0.13              | 0.13 | 2290    | 49     | 1    | 1004                  | 4000             | 3746             | 1.27    | 0.41            |  |
|                        | Control SD  |            | 0.79              | 0.09 | 3261    | 82     | 1    | 2029                  | 4000             | 3746             | 0.08    | -0.78           |  |
|                        | Ctrl MPA SD |            | 0.09              | 0.06 | 3261    | 82     | 1.01 | 409                   | 4000             | 3746             | 0.16    | -0.63           |  |
|                        | df1         |            | 2.89              | 0.22 | 3261    | 82     | 1    | 7389                  | 4000             | 3746             | -0.15   | 0.03            |  |
|                        | df2         |            | 1.96              | 0.24 | 3261    | 82     | 1    | 2729                  | 4000             | 3746             | 0.8     | -1.56           |  |
| MPA SD                 | 0.26        | 0.06       | 3261              | 82   | 1       | 3630   | 4000 | 3746                  | 0.5              | -0.55            |         |                 |  |
|                        | alpha       | NT:MU NT   | 0.09              | 0.09 | 1300    | 40     | 1.01 | 1273                  | 4000             | 3746             | 1.24    | -1.95           |  |
|                        | alpha.beta  |            | 0.26              | 0.1  | 2119    | 44     |      |                       |                  |                  |         |                 |  |
|                        | beta        |            | 0.17              | 0.11 | 2119    | 44     | 1    | 1649                  | 4000             | 3746             | -1.33   | 0.94            |  |
|                        | Control SD  |            | 0.92              | 0.09 | 3419    | 84     | 1    | 2255                  | 4000             | 3746             | -0.04   | -0.44           |  |
|                        | Ctrl MPA SD |            | 0.06              | 0.05 | 3419    | 84     | 1.08 | 426                   | 4000             | 3746             | -0.13   | -0.9            |  |
|                        | df1         |            | 2.57              | 0.16 | 3419    | 84     | 1    | 8246                  | 4000             | 3746             | 0.41    | 1.37            |  |
|                        | df2         |            | 2.25              | 0.3  | 3419    | 84     | 1    | 2855                  | 4000             | 3746             | -0.22   | -0.45           |  |
| MPA SD                 | 0.27        | 0.07       | 3419              | 84   | 1       | 2871   | 4000 | 3746                  | 0.66             | 0.75             |         |                 |  |

**Table S12 | Diagnostic statistics for parameters in the Bayesian models with a binary predictor (beta) to identify sites in MPA with (alpha.beta) or without (alpha) adequate staff capacity.** Intercept (alpha) represents the MPA treatment effect of interest. SD: standard deviation; df: degrees of freedom. alpha.beta parameters are the sum of the intercept (alpha) and predictor (beta) coefficients. See Table S6 for comparison descriptions.

| Predictor               | Variable    | Comparison | Log Biomass Ratio |      | # Sites | # MPAs | Rhat | Effective Sample Size | Total Iterations | Raftery & Lewis  | Geweke Z Scores |         |
|-------------------------|-------------|------------|-------------------|------|---------|--------|------|-----------------------|------------------|------------------|-----------------|---------|
|                         |             |            | Mean              | SD   |         |        |      |                       |                  | Min # Iterations | Chain 1         | Chain 2 |
| Adequate staff capacity | alpha       | MU:0       | -0.06             | 0.12 | 1896    | 20     | 1.01 | 1006                  | 4000             | 3746             | 0.54            | -0.6    |
|                         | alpha.beta  |            | 0.66              | 0.47 | 525     | 6      |      |                       |                  |                  |                 |         |
|                         | beta        |            | 0.72              | 0.48 | 525     | 6      | 1.01 | 280                   | 4000             | 3746             | -1.69           | 1.83    |
|                         | Control SD  |            | 0.86              | 0.13 | 2421    | 26     | 1    | 3113                  | 4000             | 3746             | 2.35            | 1.3     |
|                         | df1         |            | 1.15              | 0.07 | 2421    | 26     | 1    | 4700                  | 4000             | 3746             | -0.73           | 0.34    |
|                         | df2         |            | 1.39              | 0.19 | 2421    | 26     | 1    | 3853                  | 4000             | 3746             | 3.03            | 0.82    |
|                         | MPA SD      |            | 0.14              | 0.09 | 2421    | 26     | 1    | 1867                  | 4000             | 3746             | 1.99            | 0.31    |
|                         | alpha       | NT:0       | 0.25              | 0.23 | 138     | 15     | 1    | 1370                  | 4000             | 3746             | 0.84            | 0.22    |
|                         | alpha.beta  |            | 0.58              | 0.42 | 201     | 7      |      |                       |                  |                  |                 |         |
|                         | beta        |            | 0.34              | 0.47 | 201     | 7      | 1    | 1095                  | 4000             | 3746             | -1.72           | -0.73   |
|                         | Control SD  |            | 1.26              | 0.31 | 339     | 22     | 1    | 1210                  | 4000             | 3746             | -0.14           | -0.43   |
|                         | df1         |            | 4.99              | 3.95 | 339     | 22     | 1    | 2030                  | 4000             | 3746             | -1.32           | 0.61    |
|                         | df2         |            | 10.02             | 7.92 | 339     | 22     | 1    | 1949                  | 4000             | 3746             | -0.2            | 0.04    |
|                         | MPA SD      |            | 0.45              | 0.2  | 339     | 22     | 1    | 1733                  | 4000             | 3746             | 0.03            | 2.5     |
|                         | alpha       | NT:MU MU   | 0.78              | 0.32 | 544     | 13     | 1.03 | 406                   | 4000             | 3746             | 1.34            | 0.32    |
|                         | alpha.beta  |            | -0.32             | 0.31 | 505     | 6      |      |                       |                  |                  |                 |         |
|                         | beta        |            | -1.11             | 0.41 | 505     | 6      | 1.02 | 581                   | 4000             | 3746             | -1.45           | -0.73   |
|                         | Control SD  |            | 1.47              | 0.33 | 1049    | 19     | 1    | 790                   | 4000             | 3746             | 1.89            | 1.1     |
|                         | Ctrl MPA SD |            | 0.21              | 0.18 | 1049    | 19     | 1    | 668                   | 4000             | 3746             | -0.26           | -0.9    |
|                         | df1         |            | 2.49              | 0.35 | 1049    | 19     | 1    | 5902                  | 4000             | 3746             | -0.22           | -0.61   |
|                         | df2         |            | 2.34              | 0.78 | 1049    | 19     | 1    | 779                   | 4000             | 3746             | 0.28            | 0.81    |
|                         | alpha       | NT:MU NT   | 0.01              | 0.35 | 133     | 9      | 1    | 961                   | 4000             | 3746             | -1.34           | 0.48    |
|                         | alpha.beta  |            | 0.36              | 0.37 | 203     | 8      |      |                       |                  |                  |                 |         |
|                         | beta        |            | 0.35              | 0.48 | 203     | 8      | 1    | 1088                  | 4000             | 3746             | 1.79            | -0.74   |
|                         | Control SD  |            | 1.29              | 0.42 | 336     | 17     | 1    | 793                   | 4000             | 3746             | 1.1             | 0.57    |
|                         | Ctrl MPA SD |            | 0.25              | 0.22 | 336     | 17     | 1    | 769                   | 4000             | 3746             | 1.67            | 0.48    |
|                         | df1         |            | 5.61              | 4.14 | 336     | 17     | 1    | 1976                  | 4000             | 3746             | 1.43            | 0.95    |
|                         | df2         |            | 6.37              | 6.72 | 336     | 17     | 1.01 | 722                   | 4000             | 3746             | -0.13           | 0.55    |
| MPA SD                  | 0.37        | 0.22       | 336               | 17   | 1       | 1370   | 4000 | 3746                  | 1.13             | -0.1             |                 |         |

**Table S13 | Diagnostic statistics for parameters in the Bayesian models with a binary predictor (beta) to identify sites in MPA with (alpha.beta) or without (alpha) strong sustainable use regulations.** Intercept (alpha) represents the MPA treatment effect of interest. SD: standard deviation; df: degrees of freedom. alpha.beta parameters are the sum of the intercept (alpha) and predictor (beta) coefficients. See Table S6 for comparison descriptions.

| Predictor                   | Variable    | Comparison | Log Biomass Ratio |      | # Sites | # MPAs | Rhat | Effective Sample Size | Total Iterations | Raftery & Lewis  | Geweke Z Scores |         |
|-----------------------------|-------------|------------|-------------------|------|---------|--------|------|-----------------------|------------------|------------------|-----------------|---------|
|                             |             |            | Mean              | SD   |         |        |      |                       |                  | Min # Iterations | Chain 1         | Chain 2 |
| Sustainable use regulations | alpha       | MU:0       | -0.12             | 0.17 | 1788    | 7      | 1    | 406                   | 4000             | 3746             | 0.08            | -2.21   |
|                             | alpha.beta  |            | 0.09              | 0.19 | 629     | 18     |      |                       |                  |                  |                 |         |
|                             | beta        |            | 0.21              | 0.26 | 629     | 18     | 1    | 542                   | 4000             | 3746             | -0.14           | 1.27    |
|                             | Control SD  |            | 0.88              | 0.13 | 2417    | 25     | 1    | 3098                  | 4000             | 3746             | 1.87            | 2.27    |
|                             | df1         |            | 1.14              | 0.07 | 2417    | 25     | 1    | 4866                  | 4000             | 3746             | -1.12           | -1.35   |
|                             | df2         |            | 1.42              | 0.2  | 2417    | 25     | 1    | 3221                  | 4000             | 3746             | 1.97            | 2.16    |
|                             | MPA SD      |            | 0.18              | 0.1  | 2417    | 25     | 1    | 1523                  | 4000             | 3746             | 1.99            | 1.61    |
|                             | alpha       | NT:0       | 0.12              | 0.5  | 9       | 4      | 1.02 | 285                   | 4000             | 3746             | -0.46           | -0.65   |
|                             | alpha.beta  |            | 0.41              | 0.24 | 325     | 17     |      |                       |                  |                  |                 |         |
|                             | beta        |            | 0.3               | 0.55 | 325     | 17     | 1.03 | 281                   | 4000             | 3746             | 0.33            | 0.93    |
|                             | Control SD  |            | 1.13              | 0.3  | 334     | 21     | 1    | 1295                  | 4000             | 3746             | -0.12           | 0.7     |
|                             | df1         |            | 5.5               | 4.51 | 334     | 21     | 1.01 | 2036                  | 4000             | 3746             | -0.83           | 1.1     |
|                             | df2         |            | 8.9               | 7.45 | 334     | 21     | 1    | 1834                  | 4000             | 3746             | -0.28           | 1.37    |
|                             | MPA SD      |            | 0.48              | 0.19 | 334     | 21     | 1    | 1965                  | 4000             | 3746             | -0.54           | 0.9     |
|                             | alpha       | NT:MU MU   | 1.07              | 0.47 | 470     | 4      | 1.08 | 208                   | 4000             | 3746             | -0.86           | -0.07   |
|                             | alpha.beta  |            | 0.01              | 0.28 | 575     | 14     |      |                       |                  |                  |                 |         |
|                             | beta        |            | -1.06             | 0.54 | 575     | 14     | 1.11 | 205                   | 4000             | 3746             | 1.1             | -0.22   |
|                             | Control SD  |            | 1.41              | 0.31 | 1045    | 18     | 1.01 | 1062                  | 4000             | 3746             | -1.35           | 0.17    |
|                             | Ctrl MPA SD |            | 0.19              | 0.17 | 1045    | 18     | 1    | 642                   | 4000             | 3746             | -0.29           | -1.57   |
|                             | df1         |            | 2.5               | 0.36 | 1045    | 18     | 1    | 5710                  | 4000             | 3746             | -0.72           | -0.09   |
|                             | df2         |            | 2.22              | 0.65 | 1045    | 18     | 1    | 1113                  | 4000             | 3746             | -1.82           | -0.08   |
|                             | alpha       | NT:MU NT   | 0.09              | 0.9  | 7       | 2      | 1.05 | 164                   | 4000             | 3746             | 0.59            | -1.39   |
|                             | alpha.beta  |            | 0.22              | 0.32 | 324     | 14     |      |                       |                  |                  |                 |         |
|                             | beta        |            | 0.13              | 0.95 | 324     | 14     | 1.04 | 171                   | 4000             | 3746             | -0.48           | 1.42    |
|                             | Control SD  |            | 1.42              | 0.45 | 331     | 16     | 1.03 | 755                   | 4000             | 3746             | 1.66            | -0.45   |
|                             | Ctrl MPA SD |            | 0.28              | 0.25 | 331     | 16     | 1.01 | 750                   | 4000             | 3746             | 1.2             | -0.86   |
|                             | df1         |            | 6.01              | 4.69 | 331     | 16     | 1    | 2493                  | 4000             | 3746             | 0.23            | 0.56    |
|                             | df2         |            | 7.64              | 7.43 | 331     | 16     | 1.02 | 865                   | 4000             | 3746             | 1.22            | -0.02   |
| MPA SD                      | 0.47        | 0.25       | 331               | 16   | 1.01    | 1473   | 4000 | 3746                  | 1.48             | -1.06            |                 |         |
